# Supplementary material
Source: HighWire-hosted journal article supplement (https://rmdopen.bmj.com/content/8/1/e002099)

**Supplemental data Table 1.** Overview of the contribution of the different collaborating institutes to the different patient cohorts

| Collaborating institute                                                 | RA         | RDCG <sup>1</sup> | HC         | AAV       | OA        | PsA       | ReA       | SpA       | SLE       | pSS       |
|-------------------------------------------------------------------------|------------|-------------------|------------|-----------|-----------|-----------|-----------|-----------|-----------|-----------|
| Division of Rheumatology, Medical University of Vienna (Austria)        | 55         | 0                 | 0          | 0         | 25        | 25        | 20        | 25        | 0         | 0         |
| University Hospital Leuven (Belgium)                                    | 88         | 207               | 50         | 0         | 0         | 0         | 0         | 0         | 0         | 0         |
| University Hospital Ghent (Belgium)                                     | 67         | 0                 | 0          | 0         | 0         | 0         | 0         | 0         | 0         | 0         |
| OLV Hospital Aalst (Belgium)                                            | 62         | 211               | 150        | 0         | 0         | 0         | 0         | 0         | 0         | 0         |
| National Institute of Rheumatology and Physiotherapy Budapest (Hungary) | 33         | 86                | 0          | 0         | 0         | 0         | 0         | 0         | 0         | 0         |
| Centre Hospitalier de Luxembourg (Luxembourg)                           | 9          | 0                 | 0          | 0         | 0         | 0         | 0         | 0         | 0         | 0         |
| University Medical Centre Ljubljana (Slovenia)                          | 23         | 24                | 0          | 0         | 0         | 0         | 0         | 0         | 0         | 0         |
| Sahlgrenska University Hospital Gothenburg (Sweden)                     | 12         | 8                 | 0          | 24        | 0         | 0         | 0         | 0         | 0         | 0         |
| University Hospital Linköping (Sweden)                                  | 0          | 0                 | 0          | 0         | 0         | 0         | 0         | 0         | 50        | 48        |
| University Hospital Basel (Switzerland)                                 | 24         | 53                | 0          | 0         | 0         | 0         | 0         | 0         | 0         | 0         |
| Kantonsspital Aarau (Switzerland)                                       | 25         | 67                | 0          | 0         | 0         | 0         | 0         | 0         | 0         | 0         |
| <b>Total</b>                                                            | <b>398</b> | <b>656</b>        | <b>200</b> | <b>24</b> | <b>25</b> | <b>25</b> | <b>20</b> | <b>25</b> | <b>50</b> | <b>48</b> |

**Abbreviations:** RA, rheumatoid arthritis; RDCG, rheumatological consecutive control cohort; HC, healthy control; AAV, ANCA-associated vasculitis with arthritis; OA: osteoarthritis; PsA, psoriatic arthritis; ReA, reactive arthritis; SpA, spondyloarthritis, SLE, systemic lupus erythematosus; pSS, primary Sjögren's syndrome

<sup>1</sup> **RDCG (rheumatological consecutive control cohort):** this control cohort consisted of consecutive patients who for the first time consulted a rheumatologist and for whom no RA diagnosis was retained. Following patients were included: erosive hand osteoarthritis (n=16), osteoarthritis (n=39), polymyalgia rheumatica (n=35), reactive arthritis (n=15), psoriatic arthritis (n=55), spondyloarthritis (n=42), Adult Still syndrome (n=3), juvenile idiopathic arthritis (n=5), RS3PE (n=2), undifferentiated arthritis (n=8), primary Sjögren's syndrome (n=16), systemic lupus erythematosus (n=18), antiphospholipid syndrome (n=2), autoimmune myositis (n=3), cutaneous lupus erythematosus (n=2), mixed connective tissue disease (n=2), systemic sclerosis (n=1), undifferentiated SARD (n=15), fibromyalgia/psychological (n=30), gout (n=25), mechanical pain (n=258), other diseased controls (n=64; patients with: cardiac disease (n=5), ophthalmologic disease (n=3), neurological disease (4), hematological disease (n=13), pneumological disease (n=6), sarcoidosis (n=5), infection (n=7), vasculitis (n=7), other diseases (n=14))

**Supplemental data Table 2.** Descriptive characteristics of rheumatoid arthritis (RA) patients

|                                                                      | <b>Early RA<br/>( &lt; 6 weeks)</b> | <b>Established RA<br/>( ≥ 6 weeks)</b> | <b>Total</b> |
|----------------------------------------------------------------------|-------------------------------------|----------------------------------------|--------------|
| <b>Number (% total RA cohort)</b>                                    | 67 (16.8%)                          | 331 (83.2%)                            | 398          |
| <b>Female (%)</b>                                                    | 45 (59.2%)                          | 228 (68.9%)                            | 273 (68.6%)  |
| <b>Median age (min-max)</b>                                          | 58.5 (25-82)                        | 56 (18-86)                             | 57 (18-86)   |
| <b>CRP positive<sup>1</sup> (%)</b>                                  | 45 (67.2%)                          | 202 (61.0%)                            | 247 (62.1%)  |
| <b>ESR positive<sup>1</sup> (%)</b>                                  | 49 (73.1%)                          | 210 (63.4%)                            | 259 (65.1%)  |
| <b>Serology<sup>2</sup></b>                                          |                                     |                                        |              |
| <b>RF IgM and ACPA IgG negative</b>                                  | 19 (28.4%)                          | 97 (29.3%)                             | 116 (29.1%)  |
| <b>Only RF IgM positive</b>                                          | 4 (6.0%)                            | 27 (8.2%)                              | 31 (7.8%)    |
| <b>Only ACPA IgG positive</b>                                        | 7 (10.4%)                           | 27 (8.2%)                              | 34 (8.5%)    |
| <b>RF IgM and ACPA IgG positive</b>                                  | 37 (55.2%)                          | 180 (54.4%)                            | 217 (54.5%)  |
| <b>Joint involvement<sup>3</sup></b>                                 |                                     |                                        |              |
| <b>1 large joint</b>                                                 | 3 (4.5%)                            | 16 (4.8%)                              | 19 (4.8%)    |
| <b>2-10 large joints</b>                                             | 4 (6.0%)                            | 24 (7.3%)                              | 28 (7.0%)    |
| <b>1-3 small joints (large joints not counted)</b>                   | 17 (25.4%)                          | 64 (19.3%)                             | 81 (20.4%)   |
| <b>4-10 small joints (large joints not counted)</b>                  | 30 (44.8%)                          | 132 (39.9%)                            | 162 (40.7%)  |
| <b>&gt; 10 joints including at least one small joint</b>             | 13 (19.4%)                          | 95 (28.7%)                             | 108 (27.1%)  |
| <b>ACR/EULAR RA classification criteria positive<sup>1,2,3</sup></b> | 42 (62.7%)                          | 245 (74.0%)                            | 287 (72.1%)  |

<sup>1</sup>based on the cut-offs as defined by the manufacturers of the tests used

<sup>2</sup>based on serology tests and cut-offs of Thermo Fisher Scientific

<sup>3</sup>as included in the 2010 ACR/EULAR RA classification criteria(11)

**Abbreviations:** CRP, C-reactive protein; ESR, erythrocyte sedimentation rate; RF, rheumatoid factor; ACPA, anti-citrullinated protein/peptide antibodies

**Supplemental data Table 3.** Demographic features of the different patient cohorts

## a) Total patient cohorts

|                   | <b>RA</b> | <b>HC</b> | <b>RDCG</b> | <b>AAV</b> | <b>OA</b> | <b>PsA</b> | <b>ReA</b> | <b>SpA</b> | <b>SLE</b> | <b>pSS</b> | <b>Control total</b> |
|-------------------|-----------|-----------|-------------|------------|-----------|------------|------------|------------|------------|------------|----------------------|
| <b>number</b>     | 398       | 200       | 656         | 24         | 25        | 25         | 20         | 25         | 50         | 48         | 1073                 |
| <b>min age</b>    | 18        | 19        | 11          | 22         | 43        | 41         | 20         | 18         | 24         | 32         | 11                   |
| <b>max age</b>    | 86        | 87        | 92          | 78         | 81        | 81         | 69         | 67         | 92         | 82         | 92                   |
| <b>median age</b> | 57        | 46        | 53          | 59         | 61        | 54         | 48         | 44         | 52         | 65         | 53                   |
| <b>Female</b>     | 273       | 123       | 469         | 13         | 23        | 9          | 12         | 6          | 45         | 45         | 745                  |
| <b>(%)</b>        | (68.8%)   | (61.5%)   | (71.5%)     | (54.2%)    | (92.0%)   | (36.0%)    | (60.0%)    | (24.0%)    | (90.0%)    | (93.8%)    | (69.4%)              |

b) Patient cohorts of the postponed analysis (S RF, S ACPA, B ACPA)<sup>a</sup>

|                   | <b>RA</b> | <b>HC</b> | <b>RDCG</b> | <b>AAV</b> | <b>OA</b> | <b>PsA</b> | <b>ReA</b> | <b>SpA</b> | <b>SLE</b> | <b>pSS</b> | <b>Control total</b> |
|-------------------|-----------|-----------|-------------|------------|-----------|------------|------------|------------|------------|------------|----------------------|
| <b>number</b>     | 362       | 196       | 594         | 21         | 24        | 25         | 20         | 24         | 49         | 43         | 996                  |
| <b>min age</b>    | 18        | 21        | 11          | 22         | 43        | 41         | 20         | 18         | 24         | 32         | 11                   |
| <b>max age</b>    | 86        | 87        | 92          | 78         | 81        | 81         | 69         | 67         | 92         | 82         | 92                   |
| <b>median age</b> | 56        | 46        | 54          | 58         | 61        | 54         | 48         | 45         | 52         | 66         | 53                   |
| <b>Female</b>     | 252       | 120       | 431         | 12         | 22        | 9          | 12         | 6          | 44         | 40         | 696                  |
| <b>(%)</b>        | (69.6%)   | (61.2)    | (72.6%)     | (57.1%)    | (91.7%)   | (36.0%)    | (60.0%)    | (25.0%)    | (89.8%)    | (93.0%)    | (69.9%)              |

**Abbreviations:** RA, rheumatoid arthritis; HC, healthy control; RDCG, rheumatological disease controls; AAV, ANCA associated vasculitis with arthritis; OA: osteoarthritis; PsA, psoriatic arthritis; ReA, reactive arthritis; SpA, spondyloarthritis; SLE, systemic lupus erythematosus; pSS, primary Sjögren's syndrome

<sup>a</sup> Due to the unavailability of reagents or an instrument in Belgium, the analyses of respectively ACPA Bio-Rad and RF/ACPA Siemens were performed after the 19 analyses batches of the other analysis runs. These analyses was performed on a smaller cohort of samples consisting of 362 RA patients, 594 RDCG, 206 DCG and 196 HC samples.

**Supplemental data Table 4.** Assay characteristics

| Assay (Company)                                            | Instrument (Company)                     | Measuring principle | Units                      | Measuring range |      | Cut-off |      |
|------------------------------------------------------------|------------------------------------------|---------------------|----------------------------|-----------------|------|---------|------|
|                                                            |                                          |                     |                            | Min.            | Max. |         |      |
| <b>Rheumatoid Factor (RF)</b>                              |                                          |                     |                            |                 |      |         |      |
| EliA RF IgM (Thermo Fisher Scientific)                     | Phadia® 250 (Thermo Fisher Scientific)   |                     | FEIA                       | IU/mL           | 0.4  | 200     | 5*   |
| AUTOZYME RF IgM (Cambridge Life Science)                   | QUANTA-Lyser® 2 (Inova Diagnostics)      |                     | ELISA                      | U/mL            | 1.1  | 600     | 15.3 |
| Alegria® RF IgM (Orgentec)                                 | Alegria (Orgentec)                       |                     | ELISA                      | U/mL            | 1    | 500     | 20   |
| RF II (Roche Diagnostics)                                  | cobas c 501 (Roche Diagnostics)          |                     | Turbidimetry               | IU/mL           | 10   | 130     | 14   |
| Diagam RF (Diagam)                                         | cobas c 501 (Roche Diagnostics)          |                     | Turbidimetry               | kIU/L           | 2.2  | 120     | 20   |
| Alinity c RF (Abbott)                                      | Alinity c (Abbott)                       |                     | Turbidimetry               | IU/mL           | 20   | 200     | 30   |
| Vitros® RF (Ortho-Clinical Diagnostics)                    | VITROS 4600 (Ortho-Clinical Diagnostics) |                     | Turbidimetry               | IU/mL           | 8.6  | 120     | 12   |
| Beckman Coulter AU RF (Beckman Coulter)                    | AU680 (Beckman Coulter)                  |                     | Turbidimetry               | IU/mL           | 10   | 120     | 14   |
| Atellica® CH RF (Siemens Healthineers)                     | Atellica® CH-930 (Siemens Healthineers)  |                     | Turbidimetry               | IU/mL           | 3.5  | 90      | 14   |
| <b>Anti-cyclic citrullinated peptide antibodies (ACPA)</b> |                                          |                     |                            |                 |      |         |      |
| EliA CCP IgG (Thermo Fisher Scientific)                    | Phadia® 250 (Thermo Fisher Scientific)   |                     | FEIA                       | U/mL            | 0.4  | 340     | 10** |
| Elecsys® Anti-CCP IgG (Roche Diagnostics)                  | cobas e 601 (Roche Diagnostics)          |                     | ECLIA                      | U/mL            | 7    | 500     | 17   |
| IMMUNOSCAN CCPlus® (Svar Life Science)                     | QUANTA-Lyser® 2 (Inova Diagnostics)      |                     | ELISA                      | U/mL            | 25   | 3200    | 25   |
| IDS CCP (Immunodiagnostic Systems [IDS])                   | IDS-iSYS (ids)                           |                     | CLIA                       | AU/mL           | 1.2  | 320     | 5    |
| Alegria® Anti-CCP hs® (Orgentec)                           | Alegria (Orgentec)                       |                     | ELISA                      | U/mL            | 1    | 1000    | 20   |
| Alinity i Anti-CCP IgG (Abbott)                            | Alinity i (Abbott)                       |                     | CMIA                       | U/mL            | 0.5  | 195.6   | 5    |
| Anti-CCP ELISA (IgG) (Euroimmun)                           | Analyzer I-2P (Euroimmun)                |                     | ELISA                      | RU/mL           | 1    | 200     | 5    |
| BioPlex CCP (Bio-Rad Laboratories)                         | BioPlex 2200 (Bio-Rad Laboratories)      |                     | Multiplex Flow Immunoassay | U/mL            | 0.5  | 300     | 3    |
| Atellica® IM anti-CCP IgG (Siemens Healthineers)           | Atellica® IM 1300 (Siemens Healthineers) |                     | CLIA                       | U/mL            | 0.54 | 200     | 5    |

\* Equivocal 3.5-5; \*\* Equivocal 7-10

**Abbreviations:** FEIA, fluorescence immunoassay; ELISA, enzyme linked immunosorbant assay; ECLIA, electrochemiluminescence immunoassay; CLIA: chemiluminescence immunoassay; CMIA, chemiluminescent microparticle immunoassay; NIBSC, national institute of biological standards and controls

**Supplemental data Table 5.** Median (range) RF (Panel A) and ACPA IgG (Panel B) concentrations in RA and control cohorts obtained with different assays.

Statistical comparison with RA is given for each of the control groups (Mann-Whitney test).

**Panel A: RF**

|             | <b>Thermo<br/>Fisher<br/>RF IgM<br/>(IU/mL)</b> | <b>Cambridge<br/>RF IgM<br/>(U/mL)</b> | <b>Orgentec<br/>RF IgM<br/>(U/mL)</b> | <b>Roche<br/>RF<br/>(IU/mL)</b> | <b>Diagam<br/>RF<br/>(kIU/L)</b> | <b>Abbott<br/>RF<br/>(IU/mL)</b> | <b>Ortho<br/>RF<br/>(IU/mL)</b> | <b>Beckman<br/>RF<br/>(IU/mL)</b> | <b>Siemens<br/>RF<br/>(IU/mL)</b> |
|-------------|-------------------------------------------------|----------------------------------------|---------------------------------------|---------------------------------|----------------------------------|----------------------------------|---------------------------------|-----------------------------------|-----------------------------------|
| <b>RA</b>   | 14.0<br>(0.2-200)                               | 20.2<br>(0.6-600.0)                    | 22.0<br>(0.5-500.0)                   | 28.8<br>(5.0-130.0)             | 26.8<br>(1.1-120.0)              | 34.1<br>(10.0-200.0)             | 28.5<br>(4.3-120.0)             | 31.5<br>(5.0-120.0)               | 32.5<br>(1.8-90.0)                |
| <b>RDCG</b> | 1.0<br>(0.2-200.0)                              | 2.7<br>(0.6-424.6)                     | 3.8<br>(0.5-500.0)                    | 5.0<br>(5.0-130.0)              | 4.1<br>(1.1-120.0)               | 10.0<br>(10.0-200.0)             | 10.7<br>(4.3-120.0)             | 5.0<br>(5.0-120.0)                | 10.0<br>(1.8-90.0)                |
|             | p<0.0001                                        | p<0.0001                               | p<0.0001                              | p<0.0001                        | p<0.0001                         | p<0.0001                         | p<0.0001                        | p<0.0001                          | p<0.0001                          |
| <b>HC</b>   | 0.9<br>(0.2-97.0)                               | 4.2<br>(0.6-86.8)                      | 4.2<br>(0.5-500)                      | 5.0<br>(5.0-59.4)               | 1.1<br>(1.1-63.9)                | 10.0<br>(10.0-72.8)              | 4.3<br>(4.3-57.9)               | 5.0<br>(5.0-69.0)                 | 9.0<br>(1.8-67.0)                 |
|             | p<0.0001                                        | p<0.0001                               | p<0.0001                              | p<0.0001                        | p<0.0001                         | p<0.0001                         | p<0.0001                        | p<0.0001                          | p<0.0001                          |
| <b>AAV</b>  | 1.1<br>(0.2-154.0)                              | 2.4<br>(0.6-306.5)                     | 3.8<br>(0.5-500.0)                    | 5.0<br>(5.0-108.1)              | 6.6<br>(6.3-120.0)               | 10.0<br>(10.0-144.5)             | 10.4<br>(4.3-109.6)             | 5.0<br>(5.0-109.0)                | 9.0<br>(1.8-90.0)                 |
|             | p=0.0001                                        | p<0.0001                               | p<0.0001                              | p<0.0001                        | p=0.0035                         | p<0.0001                         | p<0.0001                        | p<0.0001                          | p<0.0001                          |
| <b>OA</b>   | 0.7<br>(0.2-2.9)                                | 2.6<br>(0.6-8.7)                       | 3.0<br>(0.5-37.8)                     | 5.0<br>(5.0-16.0)               | 1.1<br>(1.1-9.3)                 | 10.0<br>(10.0-25.0)              | 9.2<br>(4.3-17.9)               | 5.0<br>(5.0-18.0)                 | 12.0<br>(7.0-20.0)                |
|             | p<0.0001                                        | p<0.0001                               | p<0.0001                              | p<0.0001                        | p<0.0001                         | p<0.0001                         | p<0.0001                        | p<0.0001                          | p<0.0001                          |
| <b>PsA</b>  | 0.8<br>(0.2-15.0)                               | 2.4<br>(0.6-22.1)                      | 4.1<br>(0.5-13.6)                     | 5.0<br>(5.0-13.5)               | 1.1<br>(1.1-14.9)                | 10.0<br>(10.0-23.3)              | 9.1<br>(4.3-15.9)               | 5.0<br>(5.0-15.0)                 | 10.0<br>(6.0-18.0)                |
|             | p<0.0001                                        | p<0.0001                               | p<0.0001                              | p<0.0001                        | p<0.0001                         | p<0.0001                         | p<0.0001                        | p<0.0001                          | p<0.0001                          |
| <b>ReA</b>  | 1.1<br>(0.2-200.0)                              | 4.0<br>(1.4-465.6)                     | 4.4<br>(0.5-396.5)                    | 5.0<br>(5.0-130.0)              | 1.1<br>(1.1-120.0)               | 10.0<br>(10.0-200.0)             | 10.0<br>(4.3-120.0)             | 5.0<br>(5.0-120.0)                | 12.0<br>(10.0-90.0)               |
|             | p=0.0002                                        | p=0.0039                               | p=0.0001                              | p=0.0001                        | p<0.0001                         | p<0.0001                         | p<0.0001                        | p=0.0001                          | p=0.0031                          |
| <b>SpA</b>  | 0.9<br>(0.2-13.0)                               | 2.7<br>(1.1-18.2)                      | 4.5<br>(1.1-14.6)                     | 5.0<br>(5.0-24.4)               | 1.1<br>(1.1-18.8)                | 10.0<br>(10.0-56.1)              | 9.3<br>(4.3-23.0)               | 5.0<br>(5.0-27.0)                 | 9.5<br>(1.8-30.0)                 |
|             | p<0.0001                                        | p<0.0001                               | p<0.0001                              | p<0.0001                        | p<0.0001                         | p<0.0001                         | p<0.0001                        | p<0.0001                          | p<0.0001                          |
| <b>SLE</b>  | 1.0<br>(0.2-200.0)                              | 3.2<br>(0.6-600.0)                     | 5.3<br>(0.5-333.5)                    | 5.0<br>(5.0-130.0)              | 2.8<br>(1.1-120.0)               | 10.0<br>(10.0-200.0)             | 10.6<br>(4.3-120.0)             | 5.0<br>(5.0-120.0)                | 12.0<br>(5.0-90.0)                |
|             | p<0.0001                                        | p<0.0001                               | p<0.0001                              | p<0.0001                        | p<0.0001                         | p<0.0001                         | p<0.0001                        | p<0.0001                          | p<0.0001                          |
| <b>pSS</b>  | 6.7<br>(0.2-117.0)                              | 24.7<br>(1.3-411.8)                    | 21.6<br>(1.8-500.0)                   | 18.7<br>(5.0-130.0)             | 17.4<br>(1.1-120.0)              | 59.8<br>(10.0-200.0)             | 22.2<br>(4.3-120.0)             | 26.5<br>(5.0-120.0)               | 24.0<br>(7.0-90.0)                |
|             | p=0.1575                                        | p=0.3505                               | p=0.5528                              | p=0.3038                        | p=0.2327                         | p=0.1990                         | p=0.5187                        | p=0.9771                          | p=0.7592                          |

## Panel B: ACPA IgG

|             | <b>Thermo<br/>Fisher<br/>ACPA<br/>(U/mL)</b> | <b>Roche<br/>ACPA<br/>(U/mL)</b> | <b>Svar<br/>ACPA<br/>(U/mL)</b> | <b>IDS<br/>ACPA<br/>(AU/mL)</b> | <b>Orgentec<br/>ACPA<br/>(U/mL)</b> | <b>Abbott<br/>ACPA<br/>(U/mL)</b> | <b>Euroimmun<br/>ACPA<br/>(RU/mL)</b> | <b>BioRad<br/>ACPA<br/>(U/mL)</b> | <b>Siemens<br/>ACPA<br/>(U/mL)</b> |
|-------------|----------------------------------------------|----------------------------------|---------------------------------|---------------------------------|-------------------------------------|-----------------------------------|---------------------------------------|-----------------------------------|------------------------------------|
| <b>RA</b>   | 80.5<br>(0.4-340.0)                          | 124.2<br>(3.5-500.0)             | 147.1<br>(0.8-3200.0)           | 42.5<br>(0.6-320.0)             | 68.8<br>(0.5-1000.0)                | 29.6<br>(0.2-195.6)               | 43.6<br>(0.5-200.0)                   | 33.7<br>(0.3-300.0)               | 51.9<br>(0.3-200.0)                |
| <b>RDCG</b> | 1.7<br>(0.4-340.0)<br>p<0.0001               | 3.5<br>(3.5-500.0)<br>p<0.0001   | 0.8<br>(0.8-738.1)<br>p<0.0001  | 0.6<br>(0.6-245.5)<br>p<0.0001  | 3.0<br>(0.5-100.0)<br>p<0.0001      | 0.2<br>(0.2-195.6)<br>p<0.0001    | 1.2<br>(0.5-200.0)<br>p<0.0001        | 5.0<br>(5.0-120.0)<br>p<0.0001    | 10.0<br>(1.8-90.0)<br>p<0.0001     |
| <b>HC</b>   | 1.2<br>(0.4-115.0)<br>p<0.0001               | 3.5<br>(3.5-157.6)<br>p<0.0001   | 0.8<br>(0.8-120.7)<br>p<0.0001  | 0.6<br>(0.6-26.9)<br>p<0.0001   | 2.2<br>(0.5-190.6)<br>p<0.0001      | 0.2<br>(0.2-22.0)<br>p<0.0001     | 1.1<br>(0.5-28.1)<br>p<0.0001         | 0.5<br>(0.3-74.7)<br>p<0.0001     | 0.3<br>(0.3-30.6)<br>p<0.0001      |
| <b>AAV</b>  | 1.3<br>(0.5-9.7)<br>p<0.0001                 | 3.5<br>(3.5-47.3)<br>p<0.0001    | 0.8<br>(0.8-13.6)<br>p<0.0001   | 0.6<br>(0.6-7.1)<br>p<0.0001    | 2.0<br>(0.5-15.7)<br>p<0.0001       | 0.2<br>(0.2-144.5)<br>p<0.0001    | 1.0<br>(0.5-4.6)<br>p<0.0001          | 0.3<br>(0.3-3.4)<br>p<0.0001      | 0.3<br>(0.3-5.1)<br>p<0.0001       |
| <b>OA</b>   | 1.1<br>(0.5-2.4)<br>p<0.0001                 | 3.5<br>(3.5-3.5)<br>p<0.0001     | 0.8<br>(0.8-5.8)<br>p<0.0001    | 1.2<br>(0.6-5.7)<br>p<0.0001    | 2.3<br>(1.3-6.5)<br>p<0.0001        | 0.2<br>(0.2-1.1)<br>p<0.0001      | 1.3<br>(0.5-2.9)<br>p<0.0001          | 0.3<br>(0.3-1.4)<br>p<0.0001      | 0.3<br>(0.3-0.8)<br>p<0.0001       |
| <b>PsA</b>  | 1.0<br>(0.5-1.8)<br>p<0.0001                 | 3.5<br>(3.5-3.5)<br>p<0.0001     | 1.7<br>(0.8-5.7)<br>p<0.0001    | 0.6<br>(0.6-1.9)<br>p<0.0001    | 3.0<br>(1.9-7.0)<br>p<0.0001        | 0.2<br>(0.2-2.3)<br>p<0.0001      | 0.5<br>(0.5-2.2)<br>p<0.0001          | 0.3<br>(0.3-1.3)<br>p<0.0001      | 0.3<br>(0.3-0.8)<br>p<0.0001       |
| <b>ReA</b>  | 1.1<br>(0.5-340.0)<br>p<0.0001               | 3.5<br>(3.5-500.0)<br>p<0.0001   | 0.8<br>(0.8-364.7)<br>p<0.0001  | 0.6<br>(0.6-320.0)<br>p<0.0001  | 3.7<br>(0.5-291.2)<br>p<0.0001      | 0.2<br>(0.2-195.6)<br>p<0.0001    | 1.3<br>(0.5-200.0)<br>p<0.0001        | 0.3<br>(0.3-300.0)<br>p<0.0001    | 0.3<br>(0.3-200.0)<br>p<0.0001     |
| <b>SpA</b>  | 1.2<br>(0.8-160.0)<br>p<0.0001               | 3.5<br>(3.5-337.4)<br>p<0.0001   | 0.8<br>(0.8-176.2)<br>p<0.0001  | 0.6<br>(0.6-74.3)<br>p<0.0001   | 3.5<br>(1.6-32.0)<br>p<0.0001       | 0.2<br>(0.2-92.9)<br>p<0.0001     | 1.4<br>(0.5-88.2)<br>p<0.0001         | 0.3<br>(0.3-129.5)<br>p<0.0001    | 0.3<br>(0.3-119.0)<br>p<0.0001     |
| <b>SLE</b>  | 1.2<br>(0.8-340.0)<br>p<0.0001               | 3.5<br>(3.5-500.0)<br>p<0.0001   | 0.8<br>(0.8-397.8)<br>p<0.0001  | 0.6<br>(0.6-320.0)<br>p<0.0001  | 3.8<br>(1.1-1000.0)<br>p<0.0001     | 0.2<br>(0.2-195.6)<br>p<0.0001    | 1.6<br>(0.5-200.0)<br>p<0.0001        | 0.6<br>(0.3-300.0)<br>p<0.0001    | 0.3<br>(0.3-200.0)<br>p<0.0001     |
| <b>pSS</b>  | 1.9<br>(1.0-203.0)<br>p<0.0001               | 3.5<br>(3.5-500.0)<br>p<0.0001   | 1.9<br>(0.8-322.8)<br>p<0.0001  | 0.6<br>(0.6-131.5)<br>p<0.0001  | 4.0<br>(1.2-1000.0)<br>p<0.0001     | 0.2<br>(0.2-111.7)<br>p<0.0001    | 1.5<br>(0.5-114.7)<br>p<0.0001        | 0.8<br>(0.3-300.0)<br>p<0.0001    | 0.6<br>(0.3-162.0)<br>p<0.0001     |

**Abbreviations:** RF, rheumatoid factor; ACPA, anti-citrullinated protein/peptide antibodies; RA, rheumatoid arthritis; HC, healthy control; RDCG, rheumatological disease controls; AAV, ANCA

associated vasculitis with arthritis; OA: osteoarthritis; PsA, psoriatic arthritis; ReA, reactive arthritis; SpA, spondyloarthritis, SLE, systemic lupus erythematosus; pSS, primary Sjögren's syndrome.

**Supplemental data Table 6.** Median (range) RF IgM (Panel A) and ACPA IgG concentrations (Panel B) for the different subgroups of the total rheumatological consecutive patient cohort (RDCG; n=656). Statistical comparison with RA is given for each of the RDCG subgroups (Mann-Whitney test). A detailed description of the total RDCG cohort is provided in supplemental data Table 1.

**Panel A: RF IgM Thermo Fisher (IU/mL)**

|        | RA<br>(n=398)     | RDCG total<br>(n=656)          | RDCG subgroups                 |                                |                                      |                               |                                |                               |                                                      |
|--------|-------------------|--------------------------------|--------------------------------|--------------------------------|--------------------------------------|-------------------------------|--------------------------------|-------------------------------|------------------------------------------------------|
|        |                   |                                | EOA<br>(n=16)                  | OA<br>(n=39)                   | PMR<br>(n=35)                        | ReA<br>(n=15)                 | PSA<br>(n=55)                  | SPA<br>(n=42)                 | Other<br>arthritis <sup>a</sup><br>(n=18)            |
| RF IgM | 14.0<br>(0.2-200) | 1.0<br>(0.2-200.0)<br>p<0.0001 | 0.8<br>(0.5-6.4)<br>p<0.0001   | 0.9<br>(0.2-112.0)<br>p<0.0001 | 0.9<br>(0.2-7.6)<br>p<0.0001         | 1.0<br>(0.2-6.3)<br>p=0.0001  | 1.0<br>(0.2-5.9)<br>p<0.0001   | 0.9<br>(0.2-11.0)<br>p<0.0001 | 0.8<br>(0.2-9.2)<br>p<0.0001                         |
|        |                   |                                | pSS<br>(n=16)                  | SLE<br>(n=18)                  | Other<br>SARD <sup>b</sup><br>(n=25) | Gout<br>(n=25)                | Mechanical<br>pain<br>(n=258)  | FM<br>(n=30)                  | Other<br>diseased<br>controls <sup>c</sup><br>(n=64) |
|        |                   |                                | 5.5<br>(0.5-116.0)<br>p=0.1588 | 0.7<br>(0.2-11.0)<br>p<0.0001  | 1.4<br>(0.2-200.0)<br>p=0.0001       | 1.1<br>(0.2-19.0)<br>p<0.0001 | 1.0<br>(0.2-200.0)<br>p<0.0001 | 0.8<br>(0.2-12.0)<br>p<0.0001 | 1.0<br>(0.2-99.0)<br>p<0.0001                        |

**Abbreviations:** EOA, erosive hand osteoarthritis; OA, osteoarthritis; PMR, polymyalgia rheumatica; ReA, reactive arthritis; PSA, psoriatic arthritis; SPA, spondyloarthritis; pSS, primary Sjögren's syndrome; SLE, systemic lupus erythematosus; SARD, systemic autoimmune rheumatic disease; FM, fibromyalgia.

<sup>a</sup>**Other arthritis** comprised patients with: Adult Still's disease (n=3), juvenile idiopathic arthritis (n=5), RS3PE (n=2), undifferentiated arthritis (n=8)

<sup>b</sup>**Other SARD** comprised patients with: antiphospholipid syndrome (n=2), autoimmune myositis (n=3), cutaneous lupus erythematosus (n=2), mixed connective tissue disease (n=2), systemic sclerosis (n=1), undifferentiated SARD (n=15)

<sup>c</sup>**Other diseased controls** comprised patients with: cardiac disease (n=5), ophthalmologic disease (n=3), neurological disease (4), hematological disease (n=13), pneumological disease (n=6), sarcoidosis (n=5), infection (n=7), vasculitis (n=7), other diseases (n=14)

**Panel B: ACPA IgG Thermo Fisher (U/mL)**

|                 | <b>RA</b>           | <b>RDCG total</b>              | <b>RDCG subgroups</b>          |                              |                                  |                                |                                        |                              |                                                   |
|-----------------|---------------------|--------------------------------|--------------------------------|------------------------------|----------------------------------|--------------------------------|----------------------------------------|------------------------------|---------------------------------------------------|
|                 | <b>(n=398)</b>      | <b>(n=656)</b>                 | <b>EOA<br/>(n=16)</b>          | <b>OA<br/>(n=39)</b>         | <b>PMR<br/>(n=35)</b>            | <b>ReA<br/>(n=15)</b>          | <b>PSA<br/>(n=55)</b>                  | <b>SPA<br/>(n=42)</b>        | <b>Other<br/>arthritis<sup>a</sup><br/>(n=18)</b> |
| <b>ACPA IgG</b> | 80.5<br>(0.4-340.0) | 1.7<br>(0.4-340.0)<br>p<0.0001 | 2.6<br>(1.0-4.4)<br>p=0.0002   | 1.7<br>(0.4-6.2)<br>p<0.0001 | 1.7<br>(0.8-233.0)<br>p<0.0002   | 2.1<br>(0.8-4.0)<br>p<0.0001   | 1.6<br>(0.6-13.0)<br>p<0.0001          | 1.9<br>(0.7-4.2)<br>p<0.0001 | 1.8<br>(0.8-79.0)<br>p<0.0001                     |
|                 |                     |                                | <b>SS<br/>(n=16)</b>           | <b>SLE<br/>(n=18)</b>        | <b>Other<br/>SARD<br/>(n=25)</b> | <b>Gout<br/>(n=25)</b>         | <b>Mechanical<br/>pain<br/>(n=258)</b> | <b>FM<br/>(n=30)</b>         | <b>Other<br/>diseased<br/>controls<br/>(n=64)</b> |
|                 |                     |                                | 2.4<br>(0.7-340.0)<br>p=0.0014 | 1.5<br>(0.6-6.2)<br>p<0.0001 | 1.8<br>(1.0-67.0)<br>p<0.0001    | 2.1<br>(0.7-112.0)<br>p<0.0001 | 1.6<br>(0.5-187.0)<br>p<0.0001         | 1.5<br>(0.7-8.9)<br>p<0.0001 | 1.5<br>(0.5-28.0)<br>p<0.0001                     |

**Abbreviations:** EOA, erosive hand osteoarthritis; OA, osteoarthritis; PMR, polymyalgia rheumatica; ReA, reactive arthritis; PSA, psoriatic arthritis; SPA, spondyloarthritis; pSS, Sjögren Syndrome; SLE, systemic lupus erythematosus; SARD, systemic autoimmune rheumatic disease; FM, fibromyalgia.

<sup>a</sup>**Other arthritis** comprised patients with: Adult Still's disease (n=3), juvenile idiopathic arthritis (n=5), RS3PE (n=2), undifferentiated arthritis (n=8)

<sup>b</sup>**Other SARD** comprised patients with: antiphospholipid syndrome (n=2), autoimmune myositis (n=3), cutaneous lupus erythematosus (n=2), mixed connective tissue disease (n=2), systemic sclerosis (n=1), undifferentiated SARD (n=15)

<sup>c</sup>**Other diseased controls** comprised patients with: cardiac disease (n=5), ophthalmologic disease (n=3), neurological disease (4), hematological disease (n=13), pneumological disease (n=6), sarcoidosis (n=5), infection (n=7), vasculitis (n=7), other diseases (n=14)



**Supplemental Table 7.** Sensitivity and likelihood ratios for predefined specificities (90%, 92.5%, 95%, 97.5%) for RF (**Panel A**) and ACPA (90%, 97.5%, 99%, 99.75%) assays (**Panel B**).**Panel A**

| Manufacturer              | Threshold    | Sensitivity (95% CI) | Specificity (95% CI) | LR (+) (95% CI)   | LR (-) (95% CI) |
|---------------------------|--------------|----------------------|----------------------|-------------------|-----------------|
| Thermo Fisher<br>RF IgM   | > 5.0        | 62.31 57.3 - 67.1    | 89.75 87.8 - 91.5    | 6.08 5.0 - 7.4    | 0.42 0.4 - 0.5  |
|                           | > 7.5        | 56.53 51.5 - 61.5    | 92.45 90.7 - 94.0    | 7.49 6.0 - 9.4    | 0.47 0.4 - 0.5  |
|                           | CO=10 IU/mL  | 47.99 43.0 - 53.0    | 95.15 93.7 - 96.4    | 9.90 7.5 - 13.2   | 0.55 0.5 - 0.6  |
|                           | > 45.0       | 29.15 24.7 - 33.9    | 97.67 96.6 - 98.5    | 12.51 8.2 - 19.0  | 0.73 0.7 - 0.8  |
| Cambridge<br>RF IgM       | > 12.3       | 57.29 52.3 - 62.2    | 89.93 88.0 - 91.7    | 5.69 4.7 - 6.9    | 0.47 0.4 - 0.5  |
|                           | > 17.2       | 51.76 46.7 - 56.8    | 92.45 90.7 - 94.0    | 6.86 5.4 - 8.6    | 0.52 0.5 - 0.6  |
|                           | CO=15.3 U/mL | 45.98 41.0 - 51.0    | 94.97 93.5 - 96.2    | 9.14 6.9 - 12.1   | 0.57 0.5 - 0.6  |
|                           | > 126.0      | 22.61 18.6 - 27.0    | 97.48 96.4 - 98.3    | 8.99 5.9 - 13.6   | 0.79 0.8 - 0.8  |
| Orgentec<br>RF IgM        | > 15.6       | 54.27 49.2 - 59.2    | 90.12 88.2 - 91.8    | 5.49 4.5 - 6.7    | 0.51 0.5 - 0.6  |
|                           | > 22.8       | 49.50 44.5 - 54.5    | 92.64 90.9 - 94.1    | 6.72 5.3 - 8.5    | 0.55 0.5 - 0.6  |
|                           | CO=20 IU/mL  | 42.96 38.0 - 48.0    | 94.97 93.5 - 96.2    | 8.54 6.4 - 11.3   | 0.60 0.6 - 0.7  |
|                           | > 95.8       | 30.65 26.2 - 35.4    | 97.48 96.4 - 98.3    | 12.18 8.2 - 18.2  | 0.71 0.7 - 0.8  |
| Roche RF<br>CO=14 IU/mL   | > 14.6       | 63.82 58.9 - 68.5    | 90.03 88.1 - 91.8    | 6.40 5.3 - 7.8    | 0.40 0.4 - 0.5  |
|                           | > 17.3       | 61.56 56.6 - 66.4    | 92.45 90.7 - 94.0    | 8.15 6.5 - 10.2   | 0.42 0.4 - 0.5  |
|                           | > 25.5       | 52.01 47.0 - 57.0    | 94.97 93.5 - 96.2    | 10.33 7.8 - 13.6  | 0.51 0.5 - 0.6  |
|                           | > 57.2       | 39.20 34.4 - 44.2    | 97.48 96.4 - 98.3    | 15.58 10.5 - 23.1 | 0.62 0.6 - 0.7  |
| Diagam RF<br>CO=20 IU/mL  | > 10.9       | 64.82 59.9 - 69.5    | 90.03 88.1 - 91.8    | 6.50 5.4 - 7.9    | 0.39 0.3 - 0.4  |
|                           | > 16.9       | 57.79 52.8 - 62.7    | 92.45 90.7 - 94.0    | 7.66 6.1 - 9.6    | 0.46 0.4 - 0.5  |
|                           | > 24.6       | 51.26 46.2 - 56.3    | 94.97 93.5 - 96.2    | 10.18 7.7 - 13.4  | 0.51 0.5 - 0.6  |
|                           | > 57.9       | 35.43 30.7 - 40.3    | 97.48 96.4 - 98.3    | 14.08 9.5 - 20.9  | 0.66 0.6 - 0.7  |
| Abbott RF<br>CO=30 IU/mL  | > 10.0       | 57.29 52.3 - 62.2    | 91.52 89.7 - 93.1    | 6.75 5.5 - 8.4    | 0.47 0.4 - 0.5  |
|                           | > 24.6       | 53.77 48.7 - 58.7    | 92.45 90.7 - 94.0    | 7.12 5.7 - 8.9    | 0.50 0.4 - 0.6  |
|                           | > 45.4       | 45.98 41.0 - 51.0    | 94.97 93.5 - 96.2    | 9.14 6.9 - 12.1   | 0.57 0.5 - 0.6  |
|                           | > 107.6      | 27.14 22.8 - 31.8    | 97.48 96.4 - 98.3    | 10.78 7.2 - 16.2  | 0.75 0.7 - 0.8  |
| Ortho RF<br>CO=12 IU/mL   | > 16.3       | 64.82 59.9 - 69.5    | 90.03 88.1 - 91.8    | 6.50 5.4 - 7.9    | 0.39 0.3 - 0.4  |
|                           | > 19.7       | 60.05 55.1 - 64.9    | 92.54 90.8 - 94.0    | 8.05 6.4 - 10.1   | 0.43 0.4 - 0.5  |
|                           | > 28.4       | 50.00 45.0 - 55.0    | 94.97 93.5 - 96.2    | 9.94 7.5 - 13.1   | 0.53 0.5 - 0.6  |
|                           | > 60.0       | 37.44 32.7 - 42.4    | 97.48 96.4 - 98.3    | 14.88 10.0 - 22.1 | 0.64 0.6 - 0.7  |
| Beckman RF<br>CO=14 IU/mL | > 16.8       | 64.57 59.7 - 69.3    | 89.93 88.0 - 91.7    | 6.42 5.3 - 7.8    | 0.39 0.3 - 0.5  |
|                           | > 21.0       | 59.05 54.0 - 63.9    | 92.73 91.0 - 94.2    | 8.12 6.5 - 10.2   | 0.44 0.4 - 0.5  |
|                           | > 30.0       | 50.5 45.5 - 55.5     | 95.06 93.6 - 96.3    | 10.22 7.7 - 13.5  | 0.52 0.5 - 0.6  |
|                           | > 69.8       | 35.68 31.0 - 40.6    | 97.48 96.4 - 98.3    | 14.18 9.6 - 21.0  | 0.66 0.6 - 0.7  |
| Siemens RF<br>CO=14 IU/mL | > 18.0       | 63.81 58.6 - 68.8    | 90.26 88.2 - 92.0    | 6.55 5.3 - 8.0    | 0.4 0.3 - 0.5   |
|                           | > 22.0       | 59.12 53.9 - 64.2    | 92.67 90.9 - 94.2    | 8.07 6.4 - 10.2   | 0.44 0.4 - 0.5  |
|                           | > 32.0       | 50.00 44.7 - 55.3    | 95.18 93.7 - 96.4    | 10.37 7.7 - 13.9  | 0.53 0.5 - 0.6  |
|                           | > 75.1       | 36.19 31.2 - 41.4    | 97.49 96.3 - 98.4    | 14.42 9.6 - 21.7  | 0.65 0.6 - 0.7  |

**Abbreviations:** RF, rheumatoid factor; CO, cut-off defined by the manufacturer

## Panel B

| Manufacturer  | Threshold | Sensitivity | (95% CI)    | Specificity | (95% CI)     | LR (+) | (95% CI)     | LR (-) | (95% CI)  |
|---------------|-----------|-------------|-------------|-------------|--------------|--------|--------------|--------|-----------|
| Thermo Fisher | > 3.3     | 70.1        | 65.3 - 74.6 | 90.21       | 88.3 - 91.9  | 7.16   | 5.9 - 8.7    | 0.33   | 0.3 - 0.4 |
| ACPA          | > 9.5     | 63.57       | 58.7 - 68.2 | 97.48       | 96.4 - 98.3  | 25.26  | 17.3 - 36.9  | 0.37   | 0.3 - 0.4 |
| CO=10 U/mL    | > 79.8    | 50.25       | 45.4 - 55.1 | 98.97       | 98.2 - 99.4  | 49.02  | 27.0 - 89.0  | 0.50   | 0.5 - 0.6 |
|               | > 324.6   | 29.15       | 24.7 - 33.9 | 99.72       | 99.2 - 99.9  | 104.24 | 33.3 - 326.1 | 0.71   | 0.7 - 0.8 |
| Roche ACPA    | > 3.5     | 63.82       | 58.9 - 68.5 | 95.53       | 94.1 - 96.7  | 14.27  | 10.7 - 19.0  | 0.38   | 0.3 - 0.4 |
| CO=17 U/mL    | > 36.1    | 60.80       | 55.9 - 65.5 | 97.48       | 96.4 - 98.3  | 24.16  | 16.5 - 35.4  | 0.40   | 0.4 - 0.5 |
|               | > 230.4   | 41.46       | 22.2 - 73.6 | 98.97       | 98.2 - 99.4  | 40.44  | 22.2 - 73.6  | 0.59   | 0.5 - 0.6 |
| Svar ACPA     | > 4.3     | 64.82       | 59.9 - 69.5 | 89.84       | 87.9 - 91.6  | 6.38   | 5.3 - 7.7    | 0.39   | 0.3 - 0.4 |
| CO=25 U/mL    | > 26.6    | 61.31       | 56.4 - 66.0 | 97.48       | 96.4 - 98.3  | 24.36  | 16.7 - 35.6  | 0.40   | 0.4 - 0.4 |
|               | > 147.8   | 50.00       | 45.1 - 54.9 | 98.97       | 98.2 - 99.4  | 48.77  | 26.9 - 88.5  | 0.51   | 0.5 - 0.6 |
|               | > 398.0   | 27.39       | 23.1 - 32.1 | 99.81       | 99.3 - 100.0 | 146.93 | 36.5 - 592.2 | 0.73   | 0.7 - 0.8 |
| IDS ACPA      | > 2.0     | 71.86       | 67.2 - 76.2 | 90.40       | 88.5 - 92.1  | 7.49   | 6.2 - 9.1    | 0.31   | 0.3 - 0.4 |
| CO= 5 AU/mL   | > 7.7     | 61.81       | 56.8 - 66.6 | 97.48       | 96.4 - 98.3  | 24.56  | 16.8 - 35.9  | 0.39   | 0.3 - 0.4 |
|               | > 43.4    | 49.75       | 44.7 - 54.8 | 98.97       | 98.2 - 99.5  | 48.53  | 26.7 - 88.1  | 0.51   | 0.5 - 0.6 |
|               | > 236.8   | 22.36       | 18.4 - 26.8 | 99.72       | 99.2 - 99.9  | 79.98  | 25.5 - 251.3 | 0.78   | 0.7 - 0.8 |
| Orgentec      | > 5.8     | 68.59       | 63.8 - 73.1 | 90.03       | 88.1 - 91.8  | 6.88   | 5.7 - 8.3    | 0.35   | 0.3 - 0.4 |
| ACPA          | > 14.7    | 60.55       | 55.6 - 65.4 | 97.48       | 96.4 - 98.3  | 24.06  | 16.4 - 35.2  | 0.40   | 0.4 - 0.5 |
| CO=20 U/mL    | > 137.7   | 44.97       | 40.0 - 50.0 | 98.97       | 98.2 - 99.5  | 43.87  | 24.1 - 79.8  | 0.56   | 0.5 - 0.6 |
|               | > 926.0   | 27.14       | 22.8 - 31.8 | 99.72       | 99.2 - 99.9  | 97.06  | 31.0 - 303.9 | 0.73   | 0.7 - 0.8 |
| Abbott ACPA   | > 1.0     | 68.59       | 63.8 - 73.1 | 91.33       | 89.5 - 92.9  | 7.91   | 6.4 - 9.7    | 0.34   | 0.3 - 0.4 |
| CO=5 U/mL     | > 4.5     | 62.31       | 57.3 - 67.1 | 97.48       | 96.4 - 98.3  | 24.76  | 16.9 - 36.2  | 0.39   | 0.3 - 0.4 |
|               | > 53.1    | 43.72       | 38.8 - 48.7 | 98.97       | 98.2 - 99.5  | 42.65  | 23.4 - 77.6  | 0.57   | 0.5 - 0.6 |
|               | > 188.2   | 25.13       | 20.9 - 29.7 | 99.72       | 99.2 - 99.9  | 89.87  | 28.7 - 281.7 | 0.75   | 0.7 - 0.8 |
| Euroimmun     | > 3.0     | 68.09       | 63.3 - 72.6 | 90.12       | 88.2 - 91.8  | 6.89   | 5.7 - 8.4    | 0.35   | 0.3 - 0.4 |
| ACPA          | > 9.9     | 61.06       | 56.1 - 65.9 | 97.48       | 96.4 - 98.3  | 24.26  | 16.6 - 35.5  | 0.40   | 0.4 - 0.5 |
| CO=5 RU/mL    | > 37.5    | 50.50       | 45.5 - 55.5 | 98.97       | 98.2 - 99.5  | 49.26  | 27.1 - 89.4  | 0.50   | 0.5 - 0.6 |
|               | > 187.7   | 22.86       | 18.8 - 27.3 | 99.72       | 99.2 - 99.9  | 81.78  | 26.0 - 256.8 | 0.77   | 0.7 - 0.8 |
| BioRad        | > 1.5     | 66.57       | 61.5 - 71.4 | 91.16       | 89.2 - 92.9  | 7.54   | 6.1 - 9.3    | 0.37   | 0.3 - 0.4 |
| ACPA          | > 5.5     | 58.84       | 53.6 - 64.0 | 97.49       | 96.3 - 98.4  | 23.44  | 15.8 - 34.8  | 0.42   | 0.4 - 0.5 |
| CO=3 U/mL     | > 127.5   | 42.82       | 37.7 - 48.1 | 99.00       | 98.2 - 99.5  | 42.65  | 22.8 - 79.9  | 0.58   | 0.5 - 0.6 |
| Siemens       | > 1.1     | 72.65       | 67.7 - 77.2 | 90.36       | 88.4 - 92.1  | 7.54   | 6.2 - 9.2    | 0.30   | 0.3 - 0.4 |
| ACPA          | > 5.6     | 63.26       | 58.1 - 68.2 | 97.49       | 96.3 - 98.4  | 25.20  | 17.0 - 37.4  | 0.38   | 0.3 - 0.4 |
| CO=5 U/mL     | > 57.8    | 47.79       | 42.5 - 53.1 | 99.00       | 98.2 - 99.5  | 47.60  | 25.5 - 89.0  | 0.53   | 0.5 - 0.6 |

**Abbreviations:** ACPA, anti-citrullinated peptide antibody; CO, cut-off defined by the manufacturer

**Supplemental data Table 8.** Thresholds, sensitivity and LR of the different RF (Panel A) and ACPA (Panel B) assays, with respect to different compositions of control populations. All: all control groups included; HC: healthy controls; RDCG: rheumatic disease control group; pSS: primary Sjögren's syndrome; SLE systemic lupus erythematosus.

## Panel A

| RF<br>Percentile | All            |       |       | HC only        |       |       | RDCG only      |       |       | All excl. HC, pSS and SLE |       |       |
|------------------|----------------|-------|-------|----------------|-------|-------|----------------|-------|-------|---------------------------|-------|-------|
|                  | Thres-<br>hold | Sens  | LR    | Thres-<br>hold | Sens  | LR    | Thres-<br>hold | Sens  | LR    | Thres-<br>hold            | Sens  | LR    |
| <b>TF</b>        |                |       |       |                |       |       |                |       |       |                           |       |       |
| <0.9             | na             | na    | 0.42  | na             | na    | 0.32  | na             | na    | 0.39  | na                        | na    | 0.39  |
| 0.9              | 5.0            | 0.623 | 2.14  | 2.3            | 0.714 | 2.26  | 4.0            | 0.648 | 1.43  | 4.1                       | 0.648 | 1.36  |
| 0.925            | 7.5            | 0.565 | 3.16  | 3.1            | 0.668 | 0.75  | 5.3            | 0.616 | 2.33  | 5.5                       | 0.613 | 3.28  |
| 0.95             | 15.0           | 0.480 | 7.49  | 4.2            | 0.646 | 4.27  | 8.5            | 0.555 | 7.11  | 10.3                      | 0.533 | 6.35  |
| 0.975            | 45.0           | 0.291 | 12.50 | 7.8            | 0.560 | 22.41 | 27.6           | 0.382 | 14.74 | 28.7                      | 0.377 | 14.60 |
| <b>Cambridge</b> |                |       |       |                |       |       |                |       |       |                           |       |       |
| <0.9             | na             | na    | 0.47  | na             | na    | 0.42  | na             | na    | 0.41  | na                        | na    | 0.42  |
| 0.9              | 12.3           | 0.573 | 2.20  | 9.9            | 0.623 | 1.51  | 9.1            | 0.631 | 1.13  | 9.4                       | 0.626 | 0.92  |
| 0.925            | 17.2           | 0.518 | 2.30  | 11.6           | 0.585 | 0.70  | 10.8           | 0.603 | 2.91  | 11.0                      | 0.603 | 3.31  |
| 0.95             | 26.5           | 0.460 | 9.29  | 13.1           | 0.568 | 2.31  | 16.1           | 0.528 | 3.61  | 17.1                      | 0.518 | 3.89  |
| 0.975            | 126.0          | 0.226 | 8.99  | 18.3           | 0.510 | 20.40 | 33.7           | 0.440 | 16.97 | 39.4                      | 0.422 | 16.36 |
| <b>Orgentec</b>  |                |       |       |                |       |       |                |       |       |                           |       |       |
| <0.9             | na             | na    | 0.51  | na             | na    | 0.39  | na             | na    | 0.48  | na                        | na    | 0.48  |
| 0.9              | 15.6           | 0.543 | 1.90  | 9.4            | 0.648 | 2.11  | 14.2           | 0.568 | 1.16  | 13.8                      | 0.570 | 1.23  |
| 0.925            | 22.8           | 0.495 | 2.80  | 11.7           | 0.595 | 1.41  | 16.3           | 0.538 | 2.16  | 16.1                      | 0.540 | 2.25  |
| 0.95             | 33.5           | 0.430 | 4.89  | 14.3           | 0.560 | 4.12  | 24.4           | 0.485 | 3.39  | 24.4                      | 0.485 | 3.69  |
| 0.975            | 95.8           | 0.307 | 12.18 | 27.0           | 0.457 | 18.29 | 41.2           | 0.397 | 16.28 | 41.7                      | 0.394 | 15.29 |
| <b>Roche</b>     |                |       |       |                |       |       |                |       |       |                           |       |       |
| <0.9             | na             | na    | 0.40  | na             | na    | 0.31  | na             | na    | 0.38  | na                        | na    | 0.38  |
| 0.9              | 14.6           | 0.638 | 0.93  | <LOQ           | 0.714 | 1.38  | 13.0           | 0.661 | 0.97  | 13.0                      | 0.656 | 0.87  |
| 0.925            | 17.3           | 0.616 | 3.79  | 10.8           | 0.686 | 0.50  | 15.3           | 0.636 | 1.03  | 15.4                      | 0.636 | 1.36  |
| 0.95             | 25.5           | 0.520 | 5.09  | 12.0           | 0.673 | 5.53  | 17.8           | 0.611 | 6.59  | 18.4                      | 0.601 | 5.84  |
| 0.975            | 57.2           | 0.392 | 15.58 | 21.0           | 0.563 | 22.51 | 38.3           | 0.450 | 17.36 | 36.6                      | 0.457 | 17.72 |
| <b>Diagam</b>    |                |       |       |                |       |       |                |       |       |                           |       |       |
| <0.9             | na             | na    | 0.39  | na             | na    | 0.23  | na             | na    | 0.38  | na                        | na    | 0.37  |
| 0.9              | 10.9           | 0.648 | 2.90  | 4.9            | 0.794 | 1.81  | 10.2           | 0.661 | 1.10  | 10.1                      | 0.668 | 1.95  |
| 0.925            | 16.9           | 0.578 | 2.60  | 6.1            | 0.749 | 2.18  | 12.2           | 0.636 | 2.75  | 13.2                      | 0.621 | 2.23  |
| 0.95             | 24.6           | 0.513 | 6.29  | 8.3            | 0.683 | 6.16  | 18.2           | 0.560 | 3.74  | 18.2                      | 0.560 | 3.68  |
| 0.975            | 57.9           | 0.354 | 14.08 | 18.5           | 0.560 | 22.41 | 30.5           | 0.475 | 18.32 | 30.5                      | 0.475 | 18.40 |
| <b>Abbott</b>    |                |       |       |                |       |       |                |       |       |                           |       |       |
| <0.9             | na             | na    | 0.47  | na             | na    | 0.44  | na             | na    | 0.45  | na                        | na    | 0.45  |
| 0.9              | <LOQ           | 0.573 | 3.77  | <LOQ           | 0.573 | na    | <LOQ           | 0.573 | na    | <LOQ                      | 0.573 | na    |
| 0.925            | 24.6           | 0.538 | 3.10  | <LOQ           | 0.573 | na    | <LOQ           | 0.573 | 5.36  | <LOQ                      | 0.573 | 5.45  |
| 0.95             | 45.4           | 0.460 | 7.49  | <LOQ           | 0.573 | na    | 23.9           | 0.540 | 4.43  | 23.9                      | 0.538 | 4.30  |
| 0.975            | 107.6          | 0.271 | 10.78 | <LOQ           | 0.573 | 22.91 | 52.2           | 0.432 | 16.68 | 52.3                      | 0.432 | 16.75 |
| <b>Ortho</b>     |                |       |       |                |       |       |                |       |       |                           |       |       |
| <0.9             | na             | na    | 0.39  | na             | na    | 0.30  | na             | na    | 0.37  | na                        | na    | 0.38  |
| 0.9              | 16.3           | 0.648 | 1.83  | 12.4           | 0.726 | 0.70  | 15.1           | 0.668 | 1.03  | 15.2                      | 0.661 | 0.76  |
| 0.925            | 19.7           | 0.601 | 4.15  | 12.8           | 0.709 | 0.50  | 16.9           | 0.643 | 1.65  | 16.9                      | 0.643 | 1.66  |
| 0.95             | 28.4           | 0.500 | 4.99  | 13.3           | 0.696 | 5.63  | 19.7           | 0.601 | 5.87  | 19.7                      | 0.601 | 5.84  |
| 0.975            | 60.0           | 0.374 | 14.88 | 22.8           | 0.555 | 22.21 | 38.3           | 0.457 | 17.65 | 38.4                      | 0.457 | 17.72 |
| <b>Beckman</b>   |                |       |       |                |       |       |                |       |       |                           |       |       |
| <0.9             | na             | na    | 0.39  | na             | na    | 0.33  | na             | na    | 0.38  | na                        | na    | 0.38  |
| 0.9              | 16.8           | 0.646 | 1.98  | 11.0           | 0.701 | 1.13  | 14.0           | 0.658 | 0.73  | 14.0                      | 0.658 | 0.74  |
| 0.925            | 21.0           | 0.590 | 3.67  | 12.1           | 0.678 | 0.17  | 17.0           | 0.638 | 2.09  | 17.0                      | 0.638 | 2.18  |
| 0.95             | 30.0           | 0.505 | 6.12  | 13.0           | 0.673 | 5.13  | 21.0           | 0.590 | 6.85  | 21.0                      | 0.590 | 6.33  |
| 0.975            | 69.8           | 0.357 | 14.18 | 26.0           | 0.545 | 27.26 | 42.9           | 0.455 | 17.55 | 40.3                      | 0.460 | 17.82 |
| <b>Siemens</b>   |                |       |       |                |       |       |                |       |       |                           |       |       |
| <0.9             | na             | na    | 0.40  | na             | na    | 0.34  | na             | na    | 0.36  | na                        | na    | 0.36  |
| 0.9              | 18.0           | 0.638 | 1.95  | 13.0           | 0.691 | 0.54  | 15.0           | 0.674 | 2.13  | 15.0                      | 0.674 | 1.96  |
| 0.925            | 22.0           | 0.591 | 3.63  | 14.4           | 0.682 | 0.76  | 18.5           | 0.638 | 2.01  | 19.0                      | 0.638 | 2.05  |
| 0.95             | 32.0           | 0.500 | 5.98  | 16.3           | 0.663 | 4.22  | 23.0           | 0.577 | 7.11  | 23.0                      | 0.577 | 6.65  |
| 0.975            | 75.1           | 0.362 | 14.42 | 25.4           | 0.555 | 21.77 | 48.0           | 0.434 | 17.17 | 46.3                      | 0.436 | 17.17 |

## Panel B

| ACPA<br>Percentile | All            |       |        | HC only        |       |        | RDCG only      |       |        | All excl. HC, pSS and SLE |       |        |
|--------------------|----------------|-------|--------|----------------|-------|--------|----------------|-------|--------|---------------------------|-------|--------|
|                    | Thres-<br>hold | Sens  | LR     | Thres-<br>hold | Sens  | LR     | Thres-<br>hold | Sens  | LR     | Thres-<br>hold            | Sens  | LR     |
| <b>TF</b>          |                |       |        |                |       |        |                |       |        |                           |       |        |
| <0.9               | na             | na    | 0.33   | na             | na    | 0.34   | na             | na    | 0.32   | na                        | na    | 0.32   |
| 0.9                | 3.3            | 0.701 | 0.90   | 3.5            | 0.701 | 0.54   | 3.2            | 0.709 | 0.86   | 3.1                       | 0.711 | 0.97   |
| 0.975              | 9.5            | 0.636 | 8.93   | 4.7            | 0.636 | 2.01   | 7.5            | 0.648 | 4.78   | 8.4                       | 0.641 | 6.82   |
| 0.99               | 79.8           | 0.503 | 27.30  | 14.0           | 0.503 | 22.61  | 35.3           | 0.575 | 29.01  | 59.6                      | 0.535 | 26.94  |
| 0.998              | 324.6          | 0.299 | 106.94 | 75.6           | 0.299 | 102.51 | 219.0          | 0.354 | 116.20 | 281.0                     | 0.327 | 126.57 |
| <b>Roche</b>       |                |       |        |                |       |        |                |       |        |                           |       |        |
| <0.9               | na             | na    | 0.38   | na             | na    | 0.37   | na             | na    | 0.38   | na                        | na    | 0.38   |
| 0.9                | <LOQ           | 0.638 | 1.54   | <LOQ           | 0.638 | 0.00   | <LOQ           | 0.638 | 0.82   | <LOQ                      | 0.638 | 0.81   |
| 0.975              | 36.1           | 0.608 | 12.97  | 7.1            | 0.638 | 3.18   | 15.3           | 0.626 | 1.65   | 17.7                      | 0.626 | 10.71  |
| 0.99               | 230.4          | 0.415 | 40.44  | 62.0           | 0.590 | 19.60  | 52.5           | 0.601 | 56.28  | 191.8                     | 0.460 | 44.54  |
| 0.98               | na             | na    | na     | 136.7          | 0.492 | 98.49  | na             | na    | na     | na                        | na    | na     |
| <b>Svar</b>        |                |       |        |                |       |        |                |       |        |                           |       |        |
| <0.9               | na             | na    | 0.39   | na             | na    | 0.39   | na             | na    | 0.36   | na                        | na    | 0.37   |
| 0.9                | <LOQ           | 0.648 | 0.46   | <LOQ           | 0.648 | 0.40   | <LOQ           | 0.676 | 0.96   | <LOQ                      | 0.663 | 0.64   |
| 0.975              | 26.6           | 0.613 | 7.58   | <LOQ           | 0.618 | 1.51   | <LOQ           | 0.616 | 5.77   | <LOQ                      | 0.616 | 7.46   |
| 0.99               | 147.8          | 0.500 | 30.33  | 49.7           | 0.595 | 8.54   | 116.9          | 0.528 | 37.91  | 147.4                     | 0.500 | 32.78  |
| 0.998              | 398.0          | 0.274 | 97.95  | 93.1           | 0.553 | 110.55 | 446.1          | 0.239 | 78.29  | 429.5                     | 0.246 | 95.41  |
| <b>IDS</b>         |                |       |        |                |       |        |                |       |        |                           |       |        |
| <0.9               | na             | na    | 0.31   | na             | na    | 0.31   | na             | na    | 0.30   | na                        | na    | 0.31   |
| 0.9                | 2.0            | 0.719 | 1.42   | 1.9            | 0.721 | 1.22   | 1.9            | 0.726 | 1.35   | 1.9                       | 0.721 | 1.43   |
| 0.975              | 7.7            | 0.618 | 8.09   | 4.2            | 0.636 | 1.84   | 5.9            | 0.626 | 4.45   | 6.5                       | 0.623 | 6.17   |
| 0.99               | 43.4           | 0.497 | 36.73  | 10.6           | 0.608 | 10.05  | 21.5           | 0.558 | 18.79  | 33.5                      | 0.528 | 29.53  |
| 0.998              | 236.8          | 0.224 | 79.98  | 22.2           | 0.558 | 111.56 | 74.8           | 0.415 | 135.98 | 158.0                     | 0.299 | 115.86 |
| <b>Orgentec</b>    |                |       |        |                |       |        |                |       |        |                           |       |        |
| <0.9               | na             | na    | 0.35   | na             | na    | 0.31   | na             | na    | 0.34   | na                        | na    | 0.34   |
| 0.9                | 5.8            | 0.686 | 1.08   | 5.0            | 0.719 | 1.43   | 5.6            | 0.691 | 0.82   | 5.7                       | 0.691 | 0.81   |
| 0.975              | 14.7           | 0.606 | 10.45  | 11.1           | 0.626 | 3.69   | 10.4           | 0.631 | 4.40   | 10.7                      | 0.631 | 6.82   |
| 0.99               | 137.7          | 0.450 | 23.93  | 24.9           | 0.570 | 28.64  | 24.4           | 0.570 | 24.39  | 46.0                      | 0.525 | 18.17  |
| 0.998              | 926.0          | 0.271 | 97.06  | 195.3          | 0.427 | 85.43  | 338.0          | 0.384 | 126.09 | 336.1                     | 0.384 | 148.96 |
| <b>Abbott</b>      |                |       |        |                |       |        |                |       |        |                           |       |        |
| <0.9               | na             | na    | 0.34   | na             | na    | 0.35   | na             | na    | 0.34   | na                        | na    | 0.33   |
| 0.9                | 1.0            | 0.686 | 1.02   | 1.0            | 0.686 | 0.50   | 0.9            | 0.693 | 0.80   | 0.9                       | 0.704 | 0.97   |
| 0.975              | 4.5            | 0.623 | 12.47  | 1.6            | 0.653 | 2.01   | 2.9            | 0.643 | 9.39   | 4.0                       | 0.631 | 11.20  |
| 0.99               | 53.1           | 0.437 | 24.94  | 4.5            | 0.623 | 13.57  | 29.0           | 0.500 | 21.76  | 43.6                      | 0.457 | 24.66  |
| 0.998              | 188.2          | 0.251 | 89.87  | 16.2           | 0.555 | 111.06 | 103.0          | 0.334 | 109.61 | 167.6                     | 0.266 | 103.20 |
| <b>Euroimmun</b>   |                |       |        |                |       |        |                |       |        |                           |       |        |
| <0.9               | na             | na    | 0.35   | na             | na    | 0.32   | na             | na    | 0.35   | na                        | na    | 0.35   |
| 0.9                | 3.0            | 0.681 | 0.96   | 2.4            | 0.711 | 1.14   | 2.9            | 0.683 | 0.94   | 2.9                       | 0.683 | 0.94   |
| 0.975              | 9.9            | 0.611 | 7.08   | 7.0            | 0.626 | 1.01   | 9.0            | 0.613 | 4.45   | 9.1                       | 0.613 | 5.84   |
| 0.99               | 37.5           | 0.505 | 37.07  | 9.8            | 0.611 | 10.05  | 27.9           | 0.545 | 26.04  | 32.4                      | 0.523 | 30.83  |
| 0.998              | 187.7          | 0.229 | 81.78  | 24.5           | 0.560 | 112.06 | 107.0          | 0.347 | 113.73 | 149.7                     | 0.284 | 110.02 |
| <b>BioRad</b>      |                |       |        |                |       |        |                |       |        |                           |       |        |
| <0.9               | na             | na    | 0.37   | na             | na    | 0.33   | na             | na    | 0.37   | na                        | na    | 0.37   |
| 0.9                | 1.5            | 0.666 | 1.22   | 1.1            | 0.704 | 0.83   | 1.5            | 0.666 | 0.82   | 1.5                       | 0.666 | 0.96   |
| 0.975              | 5.5            | 0.588 | 10.64  | 1.7            | 0.649 | 3.97   | 2.6            | 0.610 | 4.92   | 3.2                       | 0.608 | 11.54  |
| 0.99               | 127.5          | 0.428 | 42.65  | 5.9            | 0.588 | 24.36  | 20.5           | 0.544 | 29.54  | 93.4                      | 0.445 | 39.36  |
| 0.998              | na             | na    | na     | 60.1           | 0.464 | 90.96  | 293.3          | 0.345 | 102.56 | na                        | na    | na     |
| <b>Siemens</b>     |                |       |        |                |       |        |                |       |        |                           |       |        |
| <0.9               | na             | na    | 0.30   | na             | na    | 0.32   | na             | na    | 0.29   | na                        | na    | 0.28   |
| 0.9                | 1.1            | 0.727 | 1.32   | 1.3            | 0.713 | 0.69   | 0.9            | 0.740 | 1.37   | 0.9                       | 0.746 | 1.50   |
| 0.975              | 5.6            | 0.633 | 10.27  | 2.1            | 0.660 | 0.54   | 4.5            | 0.641 | 6.38   | 4.7                       | 0.635 | 6.85   |
| 0.99               | 57.8           | 0.478 | 47.60  | 3.8            | 0.652 | 13.54  | 34.4           | 0.544 | 27.07  | 37.5                      | 0.539 | 25.10  |
| 0.998              | na             | na    | na     | 20.7           | 0.583 | 114.24 | 133.2          | 0.362 | 107.48 | 175.2                     | 0.326 | 115.39 |

**Supplemental data Table 9.** RF test result-specific likelihood ratios determined for different compositions of the control population

**Panel A.** RF test result-specific likelihood ratios determined with healthy controls only

| Thermo Fisher     | Interval       | Fraction of controls | Fraction of patients | LR    | 95% CI        |
|-------------------|----------------|----------------------|----------------------|-------|---------------|
| <b>RF IgM</b>     |                |                      |                      |       |               |
| < 0.9             | < 2.3          | 0.905                | 0.286                | 0.32  | 0.27 - 0.37   |
| 0.9-0.925         | 2.3 - 3.1      | 0.020                | 0.045                | 2.26  | 0.78 - 6.59   |
| 0.925-0.95        | 3.1 - 4.2      | 0.030                | 0.023                | 0.75  | 0.27 - 2.09   |
| 0.95-0.975        | 4.2 - 7.8      | 0.020                | 0.086                | 4.27  | 1.54 - 11.87  |
| 0.975-1.00        | 7.8 - ≥ 200    | 0.025                | 0.560                | 22.41 | 9.39 - 53.49  |
| <b>Cambridge</b>  |                |                      |                      |       |               |
| <b>RF IgM</b>     |                |                      |                      |       |               |
| < 0.9             | < 9.9          | 0.900                | 0.377                | 0.42  | 0.37 - 0.48   |
| 0.9-0.925         | 9.9 - 11.6     | 0.025                | 0.038                | 1.51  | 0.56 - 4.09   |
| 0.925-0.95        | 11.6 - 13.1    | 0.025                | 0.017                | 0.70  | 0.23 - 2.19   |
| 0.95-0.975        | 13.1 - 18.3    | 0.025                | 0.058                | 2.31  | 0.90 - 5.99   |
| 0.975-1.00        | 18.3 - ≥ 600.0 | 0.025                | 0.510                | 20.40 | 8.54 - 48.74  |
| <b>Orgentec</b>   |                |                      |                      |       |               |
| <b>RF IgM</b>     |                |                      |                      |       |               |
| < 0.9             | < 9.4          | 0.900                | 0.352                | 0.39  | 0.34 - 0.45   |
| 0.9-0.925         | 9.4 - 11.7     | 0.025                | 0.053                | 2.11  | 0.81 - 5.51   |
| 0.925-0.95        | 11.7 - 14.3    | 0.025                | 0.035                | 1.41  | 0.51 - 3.85   |
| 0.95-0.975        | 14.3 - 27.0    | 0.025                | 0.103                | 4.12  | 1.65 - 10.27  |
| 0.975-1.00        | 27.0 - ≥ 500.0 | 0.025                | 0.457                | 18.29 | 7.65 - 43.75  |
| <b>Roche RF</b>   |                |                      |                      |       |               |
| < 0.9             | < LOQ          | 0.910                | 0.286                | 0.31  | 0.27 - 0.37   |
| 0.9-0.925         | < LOQ - 10.8   | 0.020                | 0.028                | 1.38  | 0.45 - 4.29   |
| 0.925-0.95        | 10.8 - 12.0    | 0.025                | 0.012                | 0.50  | 0.15 - 1.72   |
| 0.95-0.975        | 12.0 - 21.0    | 0.020                | 0.111                | 5.53  | 2.02 - 15.17  |
| 0.975-1.00        | 21.0 - ≥ 130.0 | 0.025                | 0.563                | 22.51 | 9.43 - 53.73  |
| <b>Diagam RF</b>  |                |                      |                      |       |               |
| < 0.9             | < 4.9          | 0.900                | 0.206                | 0.23  | 0.19 - 0.28   |
| 0.9-0.925         | 4.9 - 6.1      | 0.025                | 0.045                | 1.81  | 0.68 - 4.80   |
| 0.925-0.95        | 6.1 - 8.3      | 0.030                | 0.065                | 2.18  | 0.91 - 5.20   |
| 0.95-0.975        | 8.3 - 18.5     | 0.020                | 0.123                | 6.16  | 2.25 - 16.82  |
| 0.975-1.00        | 18.5 - ≥ 120.0 | 0.025                | 0.561                | 22.41 | 9.39 - 53.49  |
| <b>Abbott RF</b>  |                |                      |                      |       |               |
| < 0.9             | < LOQ          | 0.975                | 0.427                | 0.44  | 0.39 - 0.49   |
| 0.9-0.925         | < LOQ          | 0.000                | 0.000                | na    | na            |
| 0.925-0.95        | < LOQ          | 0.000                | 0.000                | na    | na            |
| 0.95-0.975        | < LOQ          | 0.000                | 0.000                | na    | na            |
| 0.975-1.00        | < LOQ - ≥ 200  | 0.025                | 0.573                | 22.91 | 9.60 - 54.68  |
| <b>Ortho RF</b>   |                |                      |                      |       |               |
| < 0.9             | < 12.4         | 0.900                | 0.274                | 0.30  | 0.26 - 0.36   |
| 0.9-0.925         | 12.4 - 12.8    | 0.025                | 0.018                | 0.70  | 0.23 - 2.19   |
| 0.925-0.95        | 12.8 - 13.3    | 0.025                | 0.012                | 0.50  | 0.15 - 1.72   |
| 0.95-0.975        | 13.3 - 22.8    | 0.025                | 0.141                | 5.63  | 2.29 - 13.83  |
| 0.975-1.00        | 22.8 - ≥ 120.0 | 0.025                | 0.555                | 22.21 | 9.31 - 53.01  |
| <b>Beckman RF</b> |                |                      |                      |       |               |
| < 0.9             | < 11.0         | 0.905                | 0.299                | 0.33  | 0.28 - 0.39   |
| 0.9-0.925         | 11.0 - 12.1    | 0.020                | 0.023                | 1.13  | 0.35 - 3.63   |
| 0.925-0.95        | 12.1 - 13.0    | 0.030                | 0.005                | 0.17  | 0.03 - 0.82   |
| 0.95-0.975        | 13.0 - 26.0    | 0.025                | 0.128                | 5.13  | 2.08 - 12.64  |
| 0.975-1.00        | 26.0 - ≥ 120.0 | 0.020                | 0.545                | 27.26 | 10.29 - 72.22 |
| <b>Siemens RF</b> |                |                      |                      |       |               |
| < 0.9             | < 13.0         | 0.908                | 0.310                | 0.34  | 0.29 - 0.40   |
| 0.9-0.925         | 13.0 - 14.4    | 0.015                | 0.008                | 0.54  | 0.11 - 2.66   |
| 0.925-0.95        | 14.4 - 16.3    | 0.025                | 0.019                | 0.76  | 0.24 - 2.36   |
| 0.95-0.975        | 16.3 - 25.4    | 0.026                | 0.108                | 4.22  | 1.69 - 10.54  |
| 0.975-1.00        | 25.4 - ≥ 90.0  | 0.026                | 0.555                | 21.77 | 9.12 - 51.96  |

**Panel B.** RF test result-specific likelihood ratios determined with rheumatologic consecutive controls only

| Thermo Fisher<br>RF IgM     | Interval       | Fraction of controls | Fraction of patients | LR    | 95% CI        |
|-----------------------------|----------------|----------------------|----------------------|-------|---------------|
| < 0.9                       | < 4.0          | 0.901                | 0.352                | 0.39  | 0.34 - 0.45   |
| 0.9-0.925                   | 4.0 - 5.3      | 0.023                | 0.033                | 1.43  | 0.69 - 2.96   |
| 0.925-0.95                  | 5.3 - 8.5      | 0.026                | 0.060                | 2.33  | 1.27 - 4.28   |
| 0.95-0.975                  | 8.5 - 27.6     | 0.024                | 0.173                | 7.11  | 4.19 - 12.07  |
| 0.975-1.00                  | 27.6 - ≥ 200   | 0.026                | 0.382                | 14.74 | 9.07 - 23.95  |
| <b>Cambridge<br/>RF IgM</b> |                |                      |                      |       |               |
| < 0.9                       | < 9.1          | 0.899                | 0.369                | 0.41  | 0.36 - 0.47   |
| 0.9-0.925                   | 9.1 - 10.8     | 0.024                | 0.028                | 1.13  | 0.53 - 2.42   |
| 0.925-0.95                  | 10.8 - 16.1    | 0.026                | 0.075                | 2.91  | 1.63 - 5.20   |
| 0.95-0.975                  | 16.1 - 33.7    | 0.024                | 0.088                | 3.61  | 2.02 - 6.43   |
| 0.975-1.00                  | 33.7 - ≥ 600.0 | 0.026                | 0.440                | 16.98 | 10.48 - 27.48 |
| <b>Orgentec<br/>RF IgM</b>  |                |                      |                      |       |               |
| < 0.9                       | < 14.2         | 0.899                | 0.432                | 0.48  | 0.38 - 0.48   |
| 0.9-0.925                   | 14.2 - 16.3    | 0.026                | 0.030                | 1.16  | 0.56 - 2.41   |
| 0.925-0.95                  | 16.3 - 24.4    | 0.024                | 0.053                | 2.16  | 1.14 - 4.10   |
| 0.95-0.975                  | 24.4 - 41.2    | 0.026                | 0.088                | 3.39  | 1.93 - 5.98   |
| 0.975-1.00                  | 41.2 - ≥ 500.0 | 0.024                | 0.397                | 16.28 | 9.88 - 26.81  |
| <b>Roche RF</b>             |                |                      |                      |       |               |
| < 0.9                       | < 13.0         | 0.900                | 0.339                | 0.38  | 0.33 - 0.43   |
| 0.9-0.925                   | 13.0 - 15.3    | 0.026                | 0.025                | 0.97  | 0.45 - 2.10   |
| 0.925-0.95                  | 15.3 - 17.8    | 0.024                | 0.025                | 1.03  | 2.35 - 6.13   |
| 0.95-0.975                  | 17.8 - 38.3    | 0.024                | 0.161                | 6.59  | 3.87 - 11.24  |
| 0.975-1.00                  | 38.3 - ≥ 130.0 | 0.026                | 0.450                | 17.36 | 18.26 - 51.71 |
| <b>Diagam RF</b>            |                |                      |                      |       |               |
| < 0.9                       | < 10.2         | 0.901                | 0.339                | 0.38  | 0.33 - 0.43   |
| 0.9-0.925                   | 10.2 - 12.2    | 0.023                | 0.025                | 1.10  | 0.50 - 2.42   |
| 0.925-0.95                  | 12.2 - 18.2    | 0.027                | 0.075                | 2.75  | 1.55 - 4.86   |
| 0.95-0.975                  | 18.2 - 30.5    | 0.023                | 0.086                | 3.74  | 2.06 - 6.77   |
| 0.975-1.00                  | 30.5 - ≥ 120.0 | 0.026                | 0.475                | 18.32 | 11.33 - 29.63 |
| <b>Abbott RF</b>            |                |                      |                      |       |               |
| < 0.9                       | < LOQ          | 0.944                | 0.427                | 0.45  | 0.40 - 0.51   |
| 0.9-0.925                   | < LOQ          | 0.000                | 0.000                | na    | na            |
| 0.925-0.95                  | < LOQ - 23.9   | 0.006                | 0.033                | 5.36  | 1.76 - 16.32  |
| 0.95-0.975                  | 23.9 - 52.2    | 0.024                | 0.108                | 4.43  | 2.53 - 7.76   |
| 0.975-1.00                  | 52.2 - ≥ 200   | 0.026                | 0.432                | 16.68 | 10.29 - 27.02 |
| <b>Ortho RF</b>             |                |                      |                      |       |               |
| < 0.9                       | < 15.1         | 0.900                | 0.332                | 0.37  | 0.32 - 0.43   |
| 0.9-0.925                   | 15.1 - 16.9    | 0.024                | 0.025                | 1.03  | 0.47 - 2.25   |
| 0.925-0.95                  | 16.9 - 19.7    | 0.026                | 0.043                | 1.65  | 0.85 - 3.19   |
| 0.95-0.975                  | 19.7 - 38.3    | 0.024                | 0.143                | 5.87  | 3.42 - 10.08  |
| 0.975-1.00                  | 38.3 - ≥ 120.0 | 0.026                | 0.457                | 17.65 | 10.91 - 28.55 |
| <b>Beckman RF</b>           |                |                      |                      |       |               |
| < 0.9                       | < 14.0         | 0.904                | 0.342                | 0.38  | 0.33 - 0.43   |
| 0.9-0.925                   | 14.0 - 17.0    | 0.027                | 0.020                | 0.73  | 0.32 - 1.67   |
| 0.925-0.95                  | 17.0 - 21.0    | 0.023                | 0.048                | 2.09  | 1.07 - 4.06   |
| 0.95-0.975                  | 21.0 - 42.9    | 0.020                | 0.136                | 6.85  | 3.79 - 12.38  |
| 0.975-1.00                  | 42.9 - ≥ 120.0 | 0.026                | 0.454                | 17.55 | 10.84 - 28.40 |
| <b>Siemens RF</b>           |                |                      |                      |       |               |
| < 0.9                       | < 15.0         | 0.908                | 0.326                | 0.36  | 0.28 - 0.38   |
| 0.9-0.925                   | 15.0 - 18.5    | 0.017                | 0.036                | 2.13  | 0.95 - 4.81   |
| 0.925-0.95                  | 18.5 - 23.0    | 0.030                | 0.061                | 2.01  | 1.09 - 3.69   |
| 0.95-0.975                  | 23.0 - 48.0    | 0.020                | 0.143                | 7.11  | 3.85 - 13.14  |
| 0.975-1.00                  | 48.0 - ≥ 90.0  | 0.025                | 0.434                | 17.17 | 10.28 - 28.70 |



**Panel C.** RF test result-specific likelihood ratios determined with all control groups, excluding healthy controls, primary Sjögren's syndrome and systemic lupus erythematosus diseased control groups.

| Thermo Fisher<br>RF IgM     | Interval       | Fraction of controls | Fraction of patients | LR    | 95% CI        |
|-----------------------------|----------------|----------------------|----------------------|-------|---------------|
| < 0.9                       | < 4.1          | 0.899                | 0.352                | 0.39  | 0.34 - 0.45   |
| 0.9-0.925                   | 4.1 - 5.5      | 0.025                | 0.035                | 1.36  | 0.70 - 2.67   |
| 0.925-0.95                  | 5.5 - 10.3     | 0.025                | 0.080                | 3.28  | 1.88 - 5.71   |
| 0.95-0.975                  | 10.3 - 28.7    | 0.025                | 0.156                | 6.35  | 3.86 - 10.47  |
| 0.975-1.00                  | 28.7 - ≥ 200   | 0.026                | 0.377                | 14.60 | 9.31 - 22.92  |
| <b>Cambridge<br/>RF IgM</b> |                |                      |                      |       |               |
| < 0.9                       | < 9.4          | 0.899                | 0.374                | 0.42  | 0.37 - 0.47   |
| 0.9-0.925                   | 9.4 - 11.0     | 0.024                | 0.023                | 0.92  | 0.42 - 2.02   |
| 0.925-0.95                  | 11.0 - 17.1    | 0.026                | 0.085                | 3.31  | 1.93 - 5.67   |
| 0.95-0.975                  | 17.1 - 39.4    | 0.025                | 0.096                | 3.89  | 2.28 - 6.67   |
| 0.975-1.00                  | 39.4 - ≥ 600.0 | 0.026                | 0.422                | 16.36 | 10.46 - 25.59 |
| <b>Orgentec<br/>RF IgM</b>  |                |                      |                      |       |               |
| < 0.9                       | < 13.8         | 0.900                | 0.430                | 0.48  | 0.43 - 0.54   |
| 0.9-0.925                   | 13.8 - 16.1    | 0.025                | 0.030                | 1.23  | 0.60 - 2.51   |
| 0.925-0.95                  | 16.1 - 24.4    | 0.025                | 0.055                | 2.25  | 1.24 - 4.12   |
| 0.95-0.975                  | 24.4 - 41.7    | 0.025                | 0.091                | 3.69  | 2.15 - 6.35   |
| 0.975-1.00                  | 41.7 - ≥ 500.0 | 0.025                | 0.394                | 15.29 | 9.75 - 23.96  |
| <b>Roche RF</b>             |                |                      |                      |       |               |
| < 0.9                       | < 13.0         | 0.901                | 0.345                | 0.38  | 0.33 - 0.44   |
| 0.9-0.925                   | 13.0 - 15.4    | 0.023                | 0.020                | 0.87  | 0.38 - 1.97   |
| 0.925-0.95                  | 15.4 - 18.4    | 0.026                | 0.035                | 1.36  | 0.70 - 2.67   |
| 0.95-0.975                  | 18.4 - 36.6    | 0.024                | 0.143                | 5.84  | 3.53 - 9.68   |
| 0.975-1.00                  | 36.6 - ≥ 130.0 | 0.026                | 0.457                | 17.72 | 11.35 - 27.67 |
| <b>Diagam RF</b>            |                |                      |                      |       |               |
| < 0.9                       | < 10.1         | 0.899                | 0.332                | 0.37  | 0.32 - 0.43   |
| 0.9-0.925                   | 10.1 - 13.2    | 0.025                | 0.048                | 1.95  | 1.04 - 3.64   |
| 0.925-0.95                  | 13.2 - 18.2    | 0.027                | 0.060                | 2.22  | 1.25 - 3.95   |
| 0.95-0.975                  | 18.2 - 30.5    | 0.023                | 0.085                | 3.68  | 2.10 - 6.43   |
| 0.975-1.00                  | 30.5 - ≥ 120.0 | 0.026                | 0.475                | 18.40 | 11.80 - 28.71 |
| <b>Abbott RF</b>            |                |                      |                      |       |               |
| < 0.9                       | < LOQ          | 0.943                | 0.427                | 0.45  | 0.40 - 0.51   |
| 0.9-0.925                   | < LOQ          | na                   | na                   | na    | na            |
| 0.925-0.95                  | < LOQ - 23.9   | 0.006                | 0.035                | 5.45  | 1.98 - 15.03  |
| 0.95-0.975                  | 23.9 - 52.3    | 0.025                | 0.106                | 4.30  | 2.54 - 7.30   |
| 0.975-1.00                  | 52.3 - ≥ 200   | 0.026                | 0.432                | 16.75 | 10.71 - 26.18 |
| <b>Ortho RF</b>             |                |                      |                      |       |               |
| < 0.9                       | < 15.2         | 0.901                | 0.339                | 0.38  | 0.29 - 0.39   |
| 0.9-0.925                   | 15.2 - 16.9    | 0.023                | 0.018                | 0.76  | 0.32 - 1.80   |
| 0.925-0.95                  | 16.9 - 19.7    | 0.026                | 0.043                | 1.66  | 0.88 - 3.12   |
| 0.95-0.975                  | 19.7 - 38.4    | 0.025                | 0.143                | 5.84  | 3.53 - 9.68   |
| 0.975-1.00                  | 38.4 - ≥ 120.0 | 0.025                | 0.457                | 17.72 | 11.35 - 27.67 |
| <b>Beckman RF</b>           |                |                      |                      |       |               |
| < 0.9                       | < 14.0         | 0.904                | 0.342                | 0.38  | 0.33 - 0.43   |
| 0.9-0.925                   | 14.0 - 17.0    | 0.027                | 0.020                | 0.74  | 0.33 - 1.66   |
| 0.925-0.95                  | 17.0 - 21.0    | 0.022                | 0.048                | 2.18  | 1.14 - 4.14   |
| 0.95-0.975                  | 21.0 - 40.3    | 0.021                | 0.130                | 6.33  | 3.66 - 10.94  |
| 0.975-1.00                  | 40.3 - ≥ 120.0 | 0.026                | 0.460                | 17.82 | 11.41 - 27.82 |
| <b>Siemens RF</b>           |                |                      |                      |       |               |
| < 0.9                       | < 15.0         | 0.905                | 0.326                | 0.36  | 0.31 - 0.42   |
| 0.9-0.925                   | 15.0 - 19.0    | 0.018                | 0.036                | 1.96  | 0.92 - 4.18   |
| 0.925-0.95                  | 19.0 - 23.0    | 0.030                | 0.061                | 2.05  | 1.14 - 3.68   |
| 0.95-0.975                  | 23.0 - 46.3    | 0.021                | 0.141                | 6.65  | 3.79 - 11.66  |
| 0.975-1.00                  | 46.3 - ≥ 90.0  | 0.026                | 0.436                | 17.17 | 10.72 - 27.49 |

**Supplemental data Table 10.** ACPA test result-specific likelihood ratios determined for different compositions of the control population

**Panel A.** ACPA test result-specific likelihood ratios determined with healthy controls only

| Thermo Fisher         | Interval              | Fraction of controls | Fraction of patients | LR     | 95% CI         |
|-----------------------|-----------------------|----------------------|----------------------|--------|----------------|
| <b>ACPA</b>           |                       |                      |                      |        |                |
| < 0.9                 | < 3.5                 | 0.905                | 0.307                | 0.34   | 0.29 - 0.40    |
| 0.9-0.975             | 3.5 - 4.7             | 0.070                | 0.038                | 0.54   | 0.27 - 1.09    |
| 0.975-0.99            | 4.7 - 14.0            | 0.015                | 0.030                | 2.01   | 0.57 - 7.04    |
| 0.99-0.998            | 14.0 - 75.6           | 0.005                | 0.113                | 22.61  | 3.14 - 162.85  |
| 0.998-1.00            | 75.6 - $\geq 340.0$   | 0.005                | 0.512                | 102.51 | 14.48 - 725.88 |
| <b>Roche ACPA</b>     |                       |                      |                      |        |                |
| < 0.9                 | < LOQ                 | 0.970                | 0.362                | 0.37   | 0.33 - 0.43    |
| 0.9-0.975             | <LOQ - 7.1            | 0.005                | 0.000                | 0      | na             |
| 0.975-0.99            | 7.1 - 62.0            | 0.015                | 0.048                | 3.18   | 0.95 - 10.63   |
| 0.99-0.998            | 62.0 - 136.7          | 0.005                | 0.098                | 19.60  | 2.71 - 141.61  |
| 0.998-1.00            | 136.7 - $\geq 500.0$  | 0.005                | 0.492                | 98.49  | 13.91 - 697.55 |
| <b>Svar ACPA</b>      |                       |                      |                      |        |                |
| < 0.9                 | < LOQ                 | 0.900                | 0.352                | 0.39   | 0.34 - 0.45    |
| 0.9-0.975             | < LOQ                 | 0.075                | 0.030                | 0.40   | 0.19 - 0.84    |
| 0.975-0.99            | < LOQ - 49.7          | 0.015                | 0.023                | 1.51   | 0.41 - 5.51    |
| 0.99-0.998            | 49.7 - 93.1           | 0.005                | 0.042                | 8.54   | 1.15 - 63.73   |
| 0.998-1.00            | 93.1 - $\geq 3200.0$  | 0.005                | 0.553                | 110.55 | 15.62 - 782.54 |
| <b>IDS ACPA</b>       |                       |                      |                      |        |                |
| < 0.9                 | < 1.9                 | 0.905                | 0.279                | 0.31   | 0.26 - 0.36    |
| 0.9-0.975             | 1.9 - 4.2             | 0.070                | 0.085                | 1.22   | 0.67 - 2.22    |
| 0.975-0.99            | 4.2 - 10.6            | 0.015                | 0.028                | 1.84   | 0.52 - 6.53    |
| 0.99-0.998            | 10.6 - 22.2           | 0.005                | 0.050                | 10.05  | 1.36 - 74.35   |
| 0.998-1.00            | 22.2 - $\geq 320.0$   | 0.005                | 0.558                | 111.56 | 15.76 - 789.62 |
| <b>Orgentec ACPA</b>  |                       |                      |                      |        |                |
| < 0.9                 | < 5.0                 | 0.910                | 0.282                | 0.31   | 0.26 - 0.36    |
| 0.9-0.975             | 5.0 - 11.1            | 0.065                | 0.093                | 1.43   | 0.78 - 2.63    |
| 0.975-0.99            | 11.1 - 24.9           | 0.015                | 0.055                | 3.69   | 1.12 - 12.17   |
| 0.99-0.998            | 24.9 - 195.3          | 0.005                | 0.143                | 28.64  | 4.00 - 205.34  |
| 0.998-1.00            | 195.3 - $\geq 1000.0$ | 0.005                | 0.427                | 85.43  | 12.05 - 605.49 |
| <b>Abbott ACPA</b>    |                       |                      |                      |        |                |
| < 0.9                 | < 1.0                 | 0.910                | 0.314                | 0.35   | 0.30 - 0.40    |
| 0.9-0.975             | 1.0 - 1.6             | 0.065                | 0.033                | 0.50   | 0.24 - 1.06    |
| 0.975-0.99            | 1.6 - 4.5             | 0.015                | 0.030                | 2.01   | 0.57 - 7.04    |
| 0.99-0.998            | 4.5 - 16.2            | 0.005                | 0.068                | 13.57  | 1.86 - 99.13   |
| 0.998-1.00            | 16.2 - $\geq 196.0$   | 0.005                | 0.555                | 111.06 | 15.69 - 786.08 |
| <b>Euroimmun ACPA</b> |                       |                      |                      |        |                |
| < 0.9                 | < 2.4                 | 0.900                | 0.321                | 0.32   | 0.27 - 0.38    |
| 0.9-0.975             | 2.4 - 7.0             | 0.075                | 0.085                | 1.14   | 0.64 - 2.04    |
| 0.975-0.99            | 7.0 - 9.8             | 0.015                | 0.015                | 1.01   | 0.25 - 3.98    |
| 0.99-0.998            | 9.8 - 24.5            | 0.005                | 0.050                | 10.05  | 1.36 - 74.35   |
| 0.998-1.00            | 24.5 - $\geq 200.0$   | 0.005                | 0.560                | 112.06 | 15.83 - 793.17 |
| <b>BioRad ACPA</b>    |                       |                      |                      |        |                |
| < 0.9                 | < 1.1                 | 0.908                | 0.296                | 0.33   | 0.28 - 0.38    |
| 0.9-0.975             | 1.1 - 1.7             | 0.066                | 0.055                | 0.83   | 0.42 - 1.64    |
| 0.975-0.99            | 1.7 - 5.9             | 0.015                | 0.061                | 3.97   | 1.20 - 13.10   |
| 0.99-0.998            | 5.9 - 60.1            | 0.005                | 0.124                | 24.36  | 3.38 - 175.41  |
| 0.998-1.00            | 60.1 - $\geq 300.0$   | 0.005                | 0.464                | 90.96  | 12.84 - 644.53 |
| <b>Siemens APCA</b>   |                       |                      |                      |        |                |
| < 0.9                 | < 1.3                 | 0.898                | 0.287                | 0.32   | 0.27 - 0.38    |
| 0.9-0.975             | 1.3 - 2.1             | 0.077                | 0.053                | 0.69   | 0.36 - 1.32    |
| 0.975-0.99            | 2.1 - 3.8             | 0.015                | 0.008                | 0.54   | 0.11 - 2.66    |
| 0.99-0.998            | 3.8 - 20.7            | 0.005                | 0.069                | 13.54  | 1.85 - 99.14   |
| 0.998-1.00            | 20.7 - $\geq 200.0$   | 0.005                | 0.583                | 114.24 | 16.14 - 808.54 |

**Panel B.** ACPA test result-specific likelihood ratios determined with rheumatologic consecutive disease controls only

| Thermo Fisher ACPA    | Interval        | Fraction of controls | Fraction of patients | LR     | 95% CI         |
|-----------------------|-----------------|----------------------|----------------------|--------|----------------|
| < 0.9                 | < 3.2           | 0.904                | 0.291                | 0.32   | 0.28 - 0.38    |
| 0.9-0.975             | 3.2 - 7.5       | 0.070                | 0.060                | 0.86   | 0.53 - 1.39    |
| 0.975-0.99            | 7.5 - 35.3      | 0.015                | 0.073                | 4.78   | 2.36 - 9.70    |
| 0.99-0.998            | 35.3 - 219.0    | 0.008                | 0.221                | 29.01  | 11.88 - 70.81  |
| 0.998-1.00            | 219.0 - ≥340.0  | 0.003                | 0.354                | 116.20 | 28.93 - 466.59 |
| <b>Roche ACPA</b>     |                 |                      |                      |        |                |
| < 0.9                 | < LOQ           | 0.959                | 0.362                | 0.38   | 0.33 - 0.43    |
| 0.9-0.975             | <LOQ - 15.3     | 0.015                | 0.013                | 0.82   | 0.28 - 2.39    |
| 0.975-0.99            | 15.3 - 52.5     | 0.015                | 0.025                | 1.65   | 0.69 - 3.93    |
| 0.99-1.00             | 52.5 - ≥500.0   | 0.011                | 0.600                | 56.28  | 26.82 - 118.09 |
| <b>Svar ACPA</b>      |                 |                      |                      |        |                |
| < 0.9                 | < LOQ           | 0.912                | 0.324                | 0.36   | 0.31 - 0.41    |
| 0.9-0.975             | < LOQ           | 0.062                | 0.060                | 0.96   | 0.59 - 1.57    |
| 0.975-0.99            | < LOQ - 116.9   | 0.015                | 0.088                | 5.77   | 2.89 - 11.52   |
| 0.99-0.998            | 116.9 - 446.1   | 0.008                | 0.289                | 37.91  | 15.62 - 92.01  |
| 0.998-1.00            | 446.1 - ≥3200.0 | 0.003                | 0.239                | 78.29  | 25.11 - 418.69 |
| <b>IDS ACPA</b>       |                 |                      |                      |        |                |
| < 0.9                 | < 1.9           | 0.899                | 0.273                | 0.31   | 0.26 - 0.36    |
| 0.9-0.975             | 1.9 - 5.9       | 0.075                | 0.101                | 1.34   | 0.90 - 2.01    |
| 0.975-0.99            | 5.9 - 21.5      | 0.015                | 0.068                | 4.45   | 2.18 - 9.10    |
| 0.99-0.998            | 21.5 - 74.8     | 0.008                | 0.143                | 18.79  | 7.60 - 46.48   |
| 0.998-1.00            | 74.8 - ≥320.0   | 0.003                | 0.415                | 135.98 | 33.91 - 545.23 |
| <b>Orgentec ACPA</b>  |                 |                      |                      |        |                |
| < 0.9                 | < 5.6           | 0.902                | 0.309                | 0.34   | 0.30 - 0.40    |
| 0.9-0.975             | 5.6 - 10.4      | 0.073                | 0.060                | 0.82   | 0.51 - 1.32    |
| 0.975-0.99            | 10.4 - 24.4     | 0.014                | 0.060                | 4.40   | 2.06 - 9.36    |
| 0.99-0.998            | 24.4 - 338.0    | 0.008                | 0.186                | 24.39  | 9.95 - 59.82   |
| 0.998-1.00            | 338.0 - ≥1000.0 | 0.003                | 0.384                | 126.09 | 31.43 - 505.91 |
| <b>Abbott ACPA</b>    |                 |                      |                      |        |                |
| < 0.9                 | < 0.9           | 0.912                | 0.307                | 0.34   | 0.29 - 0.39    |
| 0.9-0.975             | 0.9 - 2.9       | 0.062                | 0.050                | 0.80   | 0.48 - 1.35    |
| 0.975-0.99            | 2.9 - 29.0      | 0.015                | 0.143                | 9.39   | 4.85 - 18.18   |
| 0.99-0.998            | 29.0 - 103.0    | 0.008                | 0.166                | 21.76  | 8.84 - 53.54   |
| 0.998-1.00            | 103.0 - ≥196.0  | 0.003                | 0.334                | 109.61 | 27.28 - 440.38 |
| <b>Euroimmun ACPA</b> |                 |                      |                      |        |                |
| < 0.9                 | < 2.9           | 0.899                | 0.317                | 0.35   | 0.27 - 0.36    |
| 0.9-0.975             | 2.9 - 9.0       | 0.075                | 0.070                | 0.94   | 0.60 - 1.47    |
| 0.975-0.99            | 9.0 - 27.9      | 0.015                | 0.068                | 4.45   | 2.18 - 9.10    |
| 0.99-0.998            | 27.9 - 107.0    | 0.008                | 0.198                | 26.04  | 10.64 - 63.75  |
| 0.998-1.00            | 107.0 - ≥200.0  | 0.003                | 0.347                | 113.73 | 28.32 - 456.76 |
| <b>BioRad ACPA</b>    |                 |                      |                      |        |                |
| < 0.9                 | < 1.5           | 0.909                | 0.334                | 0.37   | 0.32 - 0.43    |
| 0.9-0.975             | 1.5 - 2.6       | 0.067                | 0.055                | 0.82   | 0.49 - 1.38    |
| 0.975-0.99            | 2.6 - 20.5      | 0.013                | 0.066                | 4.92   | 2.24 - 10.84   |
| 0.99-0.998            | 20.5 - 293.3    | 0.007                | 0.199                | 29.54  | 10.88 - 80.15  |
| 0.998-1.00            | 293.3 - ≥300.0  | 0.003                | 0.345                | 102.56 | 25.52 - 412.08 |
| <b>Siemens APCA</b>   |                 |                      |                      |        |                |
| < 0.9                 | < 0.9           | 0.902                | 0.260                | 0.29   | 0.24 - 0.34    |
| 0.9-0.975             | 0.9 - 4.5       | 0.072                | 0.099                | 1.37   | 0.90 - 2.10    |
| 0.975-0.99            | 4.5 - 34.4      | 0.015                | 0.097                | 6.38   | 3.10 - 13.12   |
| 0.99-0.998            | 34.4 - 133.2    | 0.008                | 0.182                | 27.07  | 9.95 - 73.65   |
| 0.998-1.00            | 133.2 - ≥200.0  | 0.003                | 0.362                | 107.48 | 26.76 - 431.64 |

**Panel C.** ACPA test result-specific likelihood ratios determined with all control groups, excluding healthy controls, primary Sjögren's syndrome and systemic lupus erythematosus diseased control groups

| Thermo Fisher ACPA    | Interval        | Fraction of controls | Fraction of patients | LR     | 95% CI         |
|-----------------------|-----------------|----------------------|----------------------|--------|----------------|
| < 0.9                 | < 3.1           | 0.902                | 0.289                | 0.32   | 0.27 - 0.37    |
| 0.9-0.975             | 3.1 - 8.4       | 0.072                | 0.070                | 0.97   | 0.63 - 1.51    |
| 0.975-0.99            | 8.4 - 59.6      | 0.015                | 0.105                | 6.82   | 3.63 - 12.80   |
| 0.99-0.998            | 59.6 - 281.0    | 0.008                | 0.209                | 26.94  | 11.87 - 61.14  |
| 0.998-1.00            | 281.0 - ≥340.0  | 0.003                | 0.327                | 126.57 | 31.49 - 508.81 |
| <b>Roche ACPA</b>     |                 |                      |                      |        |                |
| < 0.9                 | < LOQ           | 0.959                | 0.361                | 0.38   | 0.33 - 0.43    |
| 0.9-0.975             | <LOQ - 17.7     | 0.015                | 0.013                | 0.81   | 0.29 - 2.29    |
| 0.975-0.99            | 17.7 - 191.9    | 0.015                | 0.166                | 10.71  | 5.86 - 19.58   |
| 0.99-1.00             | 191.9 - ≥500.0  | 0.011                | 0.460                | 44.54  | 22.17 - 89.48  |
| <b>Svar ACPA</b>      |                 |                      |                      |        |                |
| < 0.9                 | < LOQ           | 0.899                | 0.337                | 0.37   | 0.33 - 0.43    |
| 0.9-0.975             | < LOQ           | 0.075                | 0.048                | 0.64   | 0.39 - 1.06    |
| 0.975-0.99            | < LOQ - 147.4   | 0.015                | 0.115                | 7.46   | 4.00 - 13.93   |
| 0.99-0.998            | 147.4 - 429.5   | 0.008                | 0.254                | 32.78  | 14.51 - 74.03  |
| 0.998-1.00            | 429.5 - ≥3200.0 | 0.003                | 0.246                | 95.41  | 23.65 - 384.90 |
| <b>IDS ACPA</b>       |                 |                      |                      |        |                |
| < 0.9                 | < 1.9           | 0.906                | 0.279                | 0.31   | 0.26 - 0.36    |
| 0.9-0.975             | 1.9 - 6.5       | 0.068                | 0.098                | 1.43   | 0.97 - 2.13    |
| 0.975-0.99            | 6.5 - 33.5      | 0.015                | 0.095                | 6.17   | 3.26 - 11.67   |
| 0.99-0.998            | 33.5 - 158.0    | 0.008                | 0.229                | 29.53  | 13.04 - 66.87  |
| 0.998-1.00            | 158.0 - ≥320.0  | 0.003                | 0.299                | 115.86 | 28.79 - 466.22 |
| <b>Orgentec ACPA</b>  |                 |                      |                      |        |                |
| < 0.9                 | < 5.7           | 0.899                | 0.309                | 0.34   | 0.30 - 0.40    |
| 0.9-0.975             | 5.7 - 10.7      | 0.075                | 0.060                | 0.80   | 0.51 - 1.28    |
| 0.975-0.99            | 10.7 - 46.0     | 0.015                | 0.106                | 6.82   | 3.63 - 12.80   |
| 0.99-0.998            | 46.0 - 336.1    | 0.008                | 0.141                | 18.17  | 7.90 - 41.81   |
| 0.998-1.00            | 336.1 - ≥1000.0 | 0.003                | 0.384                | 148.96 | 37.12 - 597.88 |
| <b>Abbott ACPA</b>    |                 |                      |                      |        |                |
| < 0.9                 | < 0.9           | 0.899                | 0.297                | 0.33   | 0.28 - 0.38    |
| 0.9-0.975             | 0.9 - 4.0       | 0.075                | 0.073                | 0.97   | 0.63 - 1.45    |
| 0.975-0.99            | 4.0 - 43.6      | 0.015                | 0.173                | 11.20  | 6.14 - 20.42   |
| 0.99-0.998            | 43.6 - 167.6    | 0.008                | 0.191                | 24.66  | 10.84 - 56.13  |
| 0.998-1.00            | 167.6 - ≥196.0  | 0.003                | 0.266                | 103.20 | 25.61 - 415.88 |
| <b>Euroimmun ACPA</b> |                 |                      |                      |        |                |
| < 0.9                 | < 2.9           | 0.899                | 0.316                | 0.35   | 0.30 - 0.41    |
| 0.9-0.975             | 2.9 - 9.1       | 0.075                | 0.070                | 0.94   | 0.61 - 1.45    |
| 0.975-0.99            | 9.1 - 32.4      | 0.015                | 0.090                | 5.84   | 3.07 - 11.10   |
| 0.99-0.998            | 32.4 - 149.7    | 0.008                | 0.239                | 30.83  | 13.63 - 69.73  |
| 0.998-1.00            | 149.7 - ≥200.0  | 0.003                | 0.234                | 110.02 | 27.32 - 442.98 |
| <b>BioRad ACPA</b>    |                 |                      |                      |        |                |
| < 0.9                 | < 1.5           | 0.914                | 0.334                | 0.37   | 0.32 - 0.42    |
| 0.9-0.975             | 1.5 - 3.2       | 0.061                | 0.058                | 0.96   | 0.58 - 1.59    |
| 0.975-0.99            | 3.2 - 93.4      | 0.014                | 0.163                | 11.54  | 5.98 - 22.29   |
| 0.99-1.00             | 93.4 - ≥300.0   | 0.011                | 0.445                | 39.36  | 19.57 - 79.15  |
| <b>Siemens APCA</b>   |                 |                      |                      |        |                |
| < 0.9                 | < 0.9           | 0.901                | 0.282                | 0.28   | 0.24 - 0.34    |
| 0.9-0.975             | 0.9 - 4.7       | 0.073                | 0.111                | 1.50   | 1.02 - 2.23    |
| 0.975-0.99            | 4.7 - 37.5      | 0.014                | 0.097                | 6.85   | 3.43 - 13.67   |
| 0.99-0.998            | 37.5 - 175.2    | 0.009                | 0.212                | 25.10  | 11.04 - 57.05  |
| 0.998-1.00            | 175.2 - ≥200.0  | 0.003                | 0.326                | 115.39 | 41.88 - 695.86 |

**Supplemental data Figure 1.** Results of serum RF IgM (A; TF RF IgM), ACPA IgG (B; TF ACPA) in rheumatoid arthritis (RA) patients and control groups (HC, healthy control; RDCG, rheumatological disease control group; AAV, ANCA associated vasculitis and arthritis; OA: osteoarthritis; PsA, psoriatic arthritis; ReA, reactive arthritis; SpA, spondyloarthritis, SLE, systemic lupus erythematosus; pSS, primary Sjögren's syndrome). Statistical comparison between RA and controls (Mann-Whitney test) is indicated for  $p > 0.05$ . See Supplemental data Table 5 for further details. Values outside the 'upper outer fence' ( $=3^{\text{rd}}$  quartile + 3 x inter-quartile range) are indicated in red. Results are shown for TF assays, but similar results were obtained for the other RF and ACPA assays included in the study.

**Panel A.**

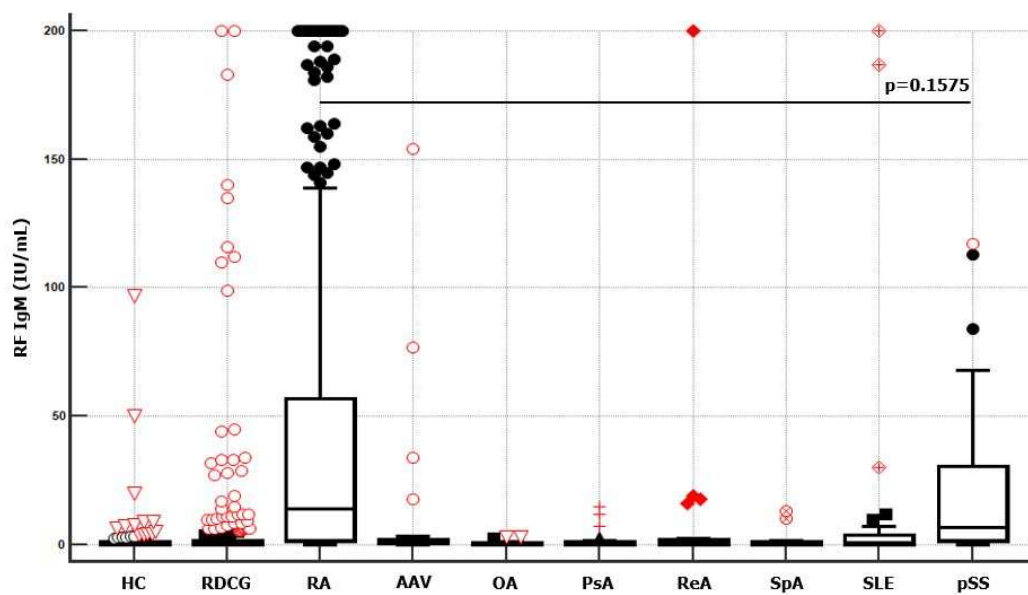



**Supplemental data Figure 2.** Results of serum RF IgM (A; TF RF IgM), ACPA IgG (B; TF ACPA) in rheumatoid arthritis (RA) patients, the total consecutive rheumatological disease control cohort (RDCG) and the RDCG subgroups (EOA, erosive hand osteoarthritis; OA: osteoarthritis; PMR, polymyalgia rheumatica; ReA, reactive arthritis; PsA, psoriatic arthritis; Other arthritis; pSS, primary Sjögren's syndrome; SLE, systemic lupus erythematosus; other systemic rheumatic diseases; Gout; Mech, mechanical pain; FM, fibromyalgia; other diseased controls). Statistical comparison between RA and controls (Mann-Whitney test) is indicated for  $p > 0.05$ . See Supplemental data Table 6 for further details. Values outside the 'upper outer fence' ( $=3\text{rd quartile} + 3 \times \text{inter-quartile range}$ ) are indicated in red. Results are shown for TF assays, but similar results were obtained for the other RF and ACPA assays included in the study.

**Panel A.**

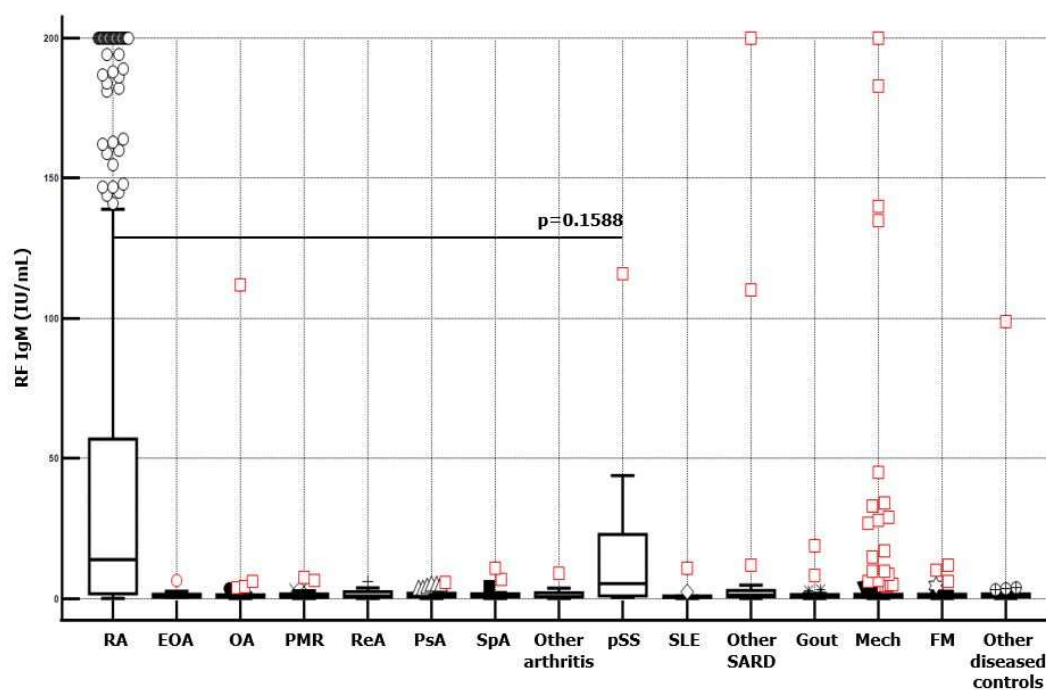



**Panel B.**

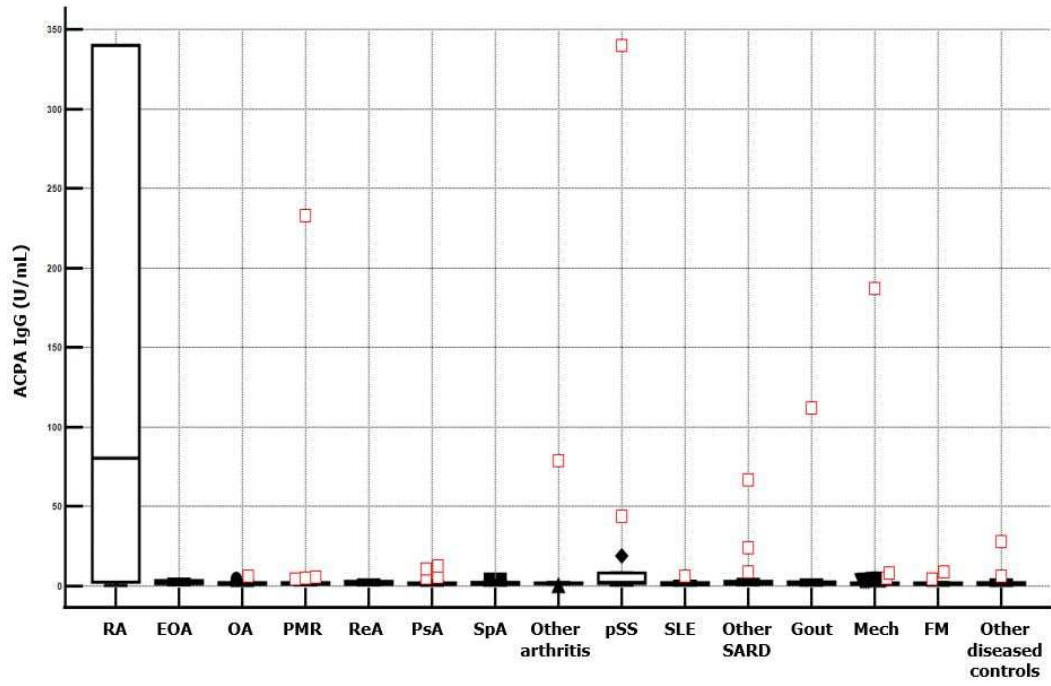

Supplement: inline-supplementary-material-1 [file inline-supplementary-material-1.pdf]
